# Supplementary material for: Detrital-zircon geochronology and provenance of the Ocloyic synorogenic clastic wedge, and Ordovician accretion of the Argentine Precordillera terrane
Source: Oxford University Press journal article supplement (doi:10.1130/ges01212.1), 2015-10-02
Supplement: 1212_supp_table_1.xlsx [file 1212_supp_table_1.xlsx]

## Sheet: Sheet1
Thomas, W.A., Astini, R.A., Mueller, P.A., and McClelland, W.C., 2015, Detrital-zircon geochronology and provenance of the Ocloyic synorogenic clastic wedge, and Ordovician accretion of the Argentine Precordillera terrane: Geosphere, v. 11, doi:10.1130/GES01212.1.
SUPPLEMENTAL TABLE 1. U/Pb ISOTOPIC DATA, AGES OF DETRITAL ZIRCONS, AND SAMPLE LOCATIONS
Sample				All Ages in Ma
Grain ID	206Pb/238U	2 s	207Pb/235U*	2 s	207Pb/206Pb	2 s	% D	204Pb/206Pb
1.DB-DB-3—Don Braulio Formation—31° 12' 57.0" S, 68° 29' 15.9" W
DB-DB-3_17	512.89	12.9175	523.487	11.6419	570	24.5675	-2.06616	0.00283117
DB-DB-3_29	614.232	17.6466	614.844	14.7655	617	24.0285	-0.0995463	0.000769971
DB-DB-3_26	618.081	19.8072	619.345	16.0079	624	18.0627	-0.204391	0.00115017
DB-DB-3_47	675.774	26.8399	682.964	22.0249	706.5	32.2501	-1.06393	0.00179613
DB-DB-3_35	1205.41	34.5577	1137.42	22.6059	1009.5	21.5849	-19.4069	0.00176466
DB-DB-3_45	1004.11	31.6214	1007.12	22.1551	1013.5	15.2499	0.926906	0.000637475
DB-DB-3_5	962.369	24.2429	980.92	17.7562	1022.5	16.5907	5.88081	0.000785978
DB-DB-3_46	922.943	30.769	963.87	25.3589	1058.5	40.1124	12.8065	0.00258073
DB-DB-3_18	1004.42	25.9436	1028.31	18.5276	1079.5	14.0395	6.95537	0.000270018
DB-DB-3_41	1112.55	35.5731	1102.78	24.2006	1083.5	19.4979	-2.68086	0.00185145
DB-DB-3_2	1010.81	27.7524	1037.23	19.8477	1093	15.5385	7.51983	0.000522335
DB-DB-3_37	1123.77	29.895	1120.76	20.232	1115	14.8403	-0.786988	0.000463265
DB-DB-3_1	1026.89	28.5793	1056.41	20.4795	1118	17.1735	8.14902	0.000657774
DB-DB-3_21	1099.46	30.7602	1106.59	21.101	1120.5	15.7339	1.87756	0.000753489
DB-DB-3_36	1176.35	31.7592	1159.37	20.9922	1127.5	15.0798	-4.33239	0.000282035
DB-DB-3_24	500.147	15.2738	630.393	52.4554	1130.5	216.214	2.06616	0.00104714
DB-DB-3_30	1207.72	38.5975	1181.56	25.1745	1134	18.2546	-6.50064	0.000466144
DB-DB-3_7	1002.46	26.466	1044.91	20.0161	1134.5	23.1932	11.6386	0.00131734
DB-DB-3_22	1123.34	39.3276	1127.76	26.3929	1136	15.6607	1.11481	0.000713287
DB-DB-3_11	1080.95	24.8556	1099.62	17.3273	1136.5	13.5456	4.88813	0.000256716
DB-DB-3_19	974.072	28.5335	1028.65	36.2758	1146.5	93.2715	15.0395	0.00754632
DB-DB-3_6	1107.17	26.5855	1130.64	18.453	1176	14.6085	5.85278	0.000510038
DB-DB-3_10	1089.39	27.7562	1121.23	19.5523	1183.5	16.424	7.95181	0.000746141
DB-DB-3_3	1113.39	32.1943	1140.09	22.152	1191	15.7179	6.51631	0.00116452
DB-DB-3_23	1236.84	31.4814	1221.95	20.3756	1195.5	13.3843	-3.45769	0.000167688
DB-DB-3_15	1078.16	26.1121	1119.59	18.484	1200.5	14.7852	10.1906	0.000246912
DB-DB-3_16	1007.08	27.1066	1072.75	23.7518	1208.5	41.9425	16.6672	0.000625892
DB-DB-3_33	1227.03	39.4767	1226.42	25.6788	1225	15.8705	-0.165541	0.000882433
DB-DB-3_20	1153.92	26.9417	1183.23	18.3932	1237	13.5213	6.71656	0.000302502
DB-DB-3_13	1129.74	28.8812	1171.44	20.1841	1249	16.7457	9.54866	0.00062848
DB-DB-3_32	1244.86	39.6383	1247.03	25.9607	1250.5	18.9845	0.45065	0.00181577
DB-DB-3_43	1282.74	34.298	1275.18	22.0425	1262.5	15.0849	-1.60317	0.000676046
DB-DB-3_14	1176.81	26.5074	1208.73	18.2832	1266	15.9802	7.04511	0.000804512
DB-DB-3_9	1015.8	27.821	1103.7	26.5066	1281	51.3097	20.7026	0.00770624
DB-DB-3_44	1465.78	40.573	1423.53	24.6466	1360.5	18.1385	-7.73857	0.000593627
DB-DB-3_28	1400.17	34.3126	1401.77	21.6805	1404	16.8118	0.272611	0.000862582
DB-DB-3_4	978.514	23.5626	1130.43	55.2634	1435	148.648	31.8109	0.00419454
DB-DB-3_25	1291.7	31.3017	1350.1	20.7463	1443.5	15.1098	10.5158	0.00113363
DB-DB-3_8	1271.08	33.0259	1342.7	22.6502	1458.5	20.2575	12.8501	0.00121955
DB-DB-3_38	1523.67	42.3892	1498.81	25.0749	1463.5	14.5122	-4.11115	0.000406607
DB-DB-3_42	884.908	39.3772	1098.85	57.908	1551	137.717	2.06616	0.00126105
DB-DB-3_48	1029.79	34.0454	1211.27	26.9451	1551	25.6894	33.6047	0.00153804
DB-DB-3_31	1735.59	46.3372	1712.71	25.76	1684.5	13.1655	-3.03323	0.000473904
DB-DB-3_27	1792.31	46.3907	1778.75	25.5814	1763	13.9989	-1.66276	0.00063314
DB-DB-3_40	1800.49	48.1146	1786.07	26.4102	1769	13.9782	-1.78	0.000417434
DB-DB-3_34	2120.75	57.6612	2109.62	28.9183	2098.5	12.7371	-1.06022	0.000370741
DB-DB-3_39	927.474	37.9316	1507.72	89.4664	2456	182.262	62.2364	0.00492165
DB-DB-3_12	2672.12	55.2767	2694.2	24.5571	2710.5	10.9216	1.41598	0.000134988
2.QLP-8—Trapiche Formation—29° 38' 56" S, 68° 43' 50" W
QLP-8_50	573.145	18.6618	582.714	15.1806	620	9.96249	-0.971532	0.000365807
QLP-8_10	604.802	21.7247	615.343	17.5808	654	14.4561	-1.07092	0.000343669
QLP-8_43	717.535	16.8287	727.754	12.9814	759	7.70603	-1.02702	0.000209325
QLP-8_47	578.351	9.86124	617.239	13.7352	762.5	50.3129	-3.87692	0.000295388
QLP-8_15	747.615	22.7363	759.143	17.4112	793	11.5764	-1.13949	0.000204471
QLP-8_54	894.918	22.2486	913.581	16.1482	959	7.64302	-1.85311	0.000551155
QLP-8_19	951.473	29.3413	962.073	21.1492	986	16.6011	-1.04201	0.00092948
QLP-8_27	949.412	29.3281	961.406	20.7871	989	9.99987	-1.14958	0.000395187
QLP-8_57	939.645	26.3334	962.864	18.7743	1016	6.59358	-2.23025	0.000100342
QLP-8_20	1034.81	37.6576	1030.3	25.5483	1020.5	9.37557	-1.40209	0.000399393
QLP-8_32	968.396	30.3016	984.969	21.3228	1022	8.46346	5.24502	0.00047471
QLP-8_41	967.16	26.3456	984.309	18.5364	1022.5	6.61921	5.41219	0.000167535
QLP-8_45	980.767	27.3609	995.074	19.1056	1026.5	6.23813	4.45526	0.000143758
QLP-8_36	987.697	27.9347	1003.06	19.5472	1036.5	8.41441	4.70841	0.000263971
QLP-8_13	997.168	29.6428	1011.71	20.8325	1043	12.2654	4.39422	0.00113646
QLP-8_14	986.814	31.2691	1007.1	22.1059	1051.5	12.7336	6.15182	0.000568066
QLP-8_4	1001.01	33.0793	1017.34	22.9788	1052.5	8.36022	4.89182	0.000213123
QLP-8_5	1038.71	28.3316	1043.34	19.3578	1053	8.02784	1.35735	0.000332896
QLP-8_49	1023.82	31.4125	1041.1	21.7813	1077.5	10.4468	4.98154	0.000538631
QLP-8_25	1069.53	34.2938	1072.67	23.1425	1079	9.13382	0.878065	0.000380504
QLP-8_8	1055.69	30.8616	1064.98	20.9878	1084	8.01326	2.61174	0.000346497
QLP-8_26	1092.67	33.5736	1091.09	22.3818	1088	7.50645	-0.429452	9.60938e-05
QLP-8_60	892.248	39.0278	952.165	28.9044	1093	8.842	18.3671	0.000234028
QLP-8_30	1075.16	25.0172	1081.84	17.0254	1095	9.06997	1.81224	0.000132426
QLP-8_38	1057.19	26.9616	1075.33	18.5944	1112	10.3682	4.92938	0.000492402
QLP-8_52	1039.1	22.5272	1065.17	15.6109	1119	6.98779	7.14041	0.00018248
QLP-8_7	1059.72	29.2821	1087.76	20.1914	1144	9.752	7.36673	0.000493803
QLP-8_9	827.941	21.0241	922.977	45.0057	1157.5	138.836	28.4716	0.00105412
QLP-8_37	695.901	20.5907	815.52	17.5654	1157.5	7.53994	39.8789	0.00071735
QLP-8_22	1132.3	36.3087	1145.43	24.0619	1170	7.98289	3.22198	0.000469744
QLP-8_17	1162.09	33.1812	1165.58	21.8265	1172	10.0689	0.845789	0.000683892
QLP-8_6	1121.93	28.2757	1141.41	18.996	1178.5	8.74543	4.80044	0.000222068
QLP-8_51	1127.31	33.3382	1148.09	22.1756	1187.5	6.17346	5.06876	0.000307593
QLP-8_18	1160.55	35.6131	1172.64	23.435	1195	9.09571	2.88269	0.000225213
QLP-8_40	1173.93	37.3502	1184.1	24.3503	1202.5	7.22259	2.3763	0.000120085
QLP-8_48	1157.81	25.576	1176.01	17.0105	1209.5	8.33643	4.2734	8.35282e-05
QLP-8_39	1190.81	49.7272	1200.25	32.0962	1217	6.76524	2.15172	0.000153667
QLP-8_12	1114.96	37.0855	1150.75	25.2023	1218.5	12.5842	8.49753	0.000333254
QLP-8_56	1172.1	27.4793	1192.98	18.1473	1231	7.81192	4.78437	0.000245973
QLP-8_46	1139.8	25.5476	1172.45	17.2245	1233	8.68446	7.55854	0.000261021
QLP-8-31	1220.15	73.0583	1230.78	46.5822	1249.5	8.87743	2.3493	0.000181849
QLP-8_59	1160.06	29.3889	1192.43	19.4845	1251.5	6.38505	7.30604	0.000167606
QLP-8_33	1209.11	31.216	1232.96	20.3477	1275	8.02366	5.16781	0.000352048
QLP-8_35	1149.21	33.0976	1194.55	22.3038	1277.5	10.4153	10.0422	0.000454213
QLP-8_53	1227.58	25.6977	1249.37	16.6124	1287	5.85444	4.61667	6.61967e-05
QLP-8_3	1267.98	34.6647	1276.85	22.0132	1291.5	8.33682	1.82151	0.000314088
QLP-8_44	1208.09	31.327	1240.09	20.4525	1296	7.17315	6.7829	4.71003e-05
QLP-8_2	1033.84	27.5146	1145.85	20.7021	1364.5	17.8681	24.2332	0.000388375
QLP-8_42	1275.41	37.0988	1313.09	23.8078	1375	9.74433	7.24255	0.000564254
QLP-8_55	1291.76	29.4608	1323.55	18.6817	1375	5.77116	6.05406	0.000142615
QLP-8_21	1395.95	49.8996	1390.13	30.1306	1381	8.74761	-1.0822	0.000512634
QLP-8_16	1458.6	51.6749	1435.04	30.6106	1400	11.8229	-4.18595	0.000323952
QLP-8_58	1180.38	59.7675	1270.93	39.9381	1427.5	6.22348	17.3113	0.000167628
QLP-8_1	1080.81	23.7943	1236.89	18.1116	1520	16.2647	28.894	0.0021352
QLP-8_24	1654.05	38.8692	1699.47	22.2762	1756	9.18387	5.8056	0.000242434
QLP-8_23	1732.31	71.6198	1763.59	39.9694	1800.5	17.5031	3.78739	8.33354e-05
QLP-8_34	1780.79	52.3087	1827.31	28.5558	1880.5	7.36422	5.30229	0.000372702
QLP-8_29	1441.36	62.0642	1631.28	38.8485	1885.5	6.88858	23.5556	0.000516876
QLP-8_28	2656.92	68.4005	2667.17	29.6146	2675	5.48104	0.675729	7.2898e-05
QLP-8_11	1881.48	52.6025	3503.83	32.9335	4600	14.5461	59.0983	0.0481823
3.QLP-7—Trapiche Formation—29° 38' 53" S, 68° 43' 47" W
QLP-7_1	971.933	44.3211	995.853	31.6904	1048.5	21.2674	7.3025	0.00586211
QLP-7_2	976.881	41.5505	999.324	29.9216	1048.5	23.7585	6.83061	0.00674495
QLP-7_3	1104.67	47.3034	1135.37	32.0799	1194.5	15.1431	7.51997	0.000763044
QLP-7_4	589.707	36.1268	612.073	29.5068	695.5	16.3688	15.2111	0.00106402
QLP-7_5	1419.94	56.1327	1438.89	34.1435	1467	14.087	3.208	0.000999241
QLP-7_6	1255.9	55.0802	1305.77	35.8597	1388.5	17.6403	9.54971	0.00258035
QLP-7_7	1275.82	48.6644	1316.65	31.3211	1383.5	14.3906	7.78324	0.00114927
QLP-7_8	937.13	54.8202	974.188	39.3507	1058.5	15.1198	11.4662	0.000350087
QLP-7_9	1321.03	52.8725	1340.58	33.1215	1372	13.024	3.71538	0.000145654
QLP-7_10	943.563	43.0858	971.008	30.9098	1033.5	16.2201	8.70221	0.00155385
QLP-7_11	601.129	19.5911	643.519	24.3988	795	80.7948	24.3862	0.0162016
QLP-7_12	1245.56	42.5033	1265.35	27.6079	1299	15.504	4.11405	0.00264956
QLP-7_13	1144.97	28.1077	1153.33	19.2348	1169	16.159	2.05601	0.000267129
QLP-7_14	1094.03	44.6219	1150.86	31.1254	1259.5	19.7158	13.138	0.000344544
QLP-7_15	1122.57	26.0215	1148.63	18.8005	1198	21.1341	6.29623	0.000387045
QLP-7_16	619.436	24.645	629.192	20.1539	664	23.5065	6.71137	0.00447752
QLP-7_17	2233.35	67.1061	2497.73	34.8055	2720	20.7454	17.8915	0.000846568
QLP-7_18	1013.47	27.1974	1022.34	19.1331	1041	13.8491	2.64493	0.000444263
QLP-7_19	1334.25	31.5101	1390.4	26.5671	1477.5	44.9494	9.69545	0.00152332
QLP-7_20	976.523	31.3259	989.196	22.2086	1017.5	14.3214	4.02721	0.000594446
QLP-7_21	1091.58	31.2889	1097.29	21.3329	1108.5	13.9544	1.52626	0.000367191
QLP-7_22	1110.08	49.6271	1111.76	33.3096	1115	19.2412	0.440852	0.00464472
QLP-7_23	987	32.159	1003.25	22.7313	1039	14.031	5.00483	0.00055288
QLP-7_24	1290.99	45.0358	1327.62	29.0379	1387	16.2732	6.92216	0.00143171
QLP-7_25	1332.65	43.8973	1351.28	27.6436	1380.5	14.1182	3.46618	0.00065463
QLP-7_26	1132	37.1886	1150.79	25.0786	1186	14.8425	4.55288	0.00127615
QLP-7_27	1020.39	32.5047	1025.51	22.5787	1036.5	13.9361	1.55443	0.000317158
QLP-7_28	1081.89	32.4841	1117.51	23.9691	1187.5	27.8976	8.89366	0.000417266
QLP-7_29	1145.69	30.769	1164.23	21.3804	1198.5	19.83	4.40644	0.000923745
QLP-7_30	1010.78	28.9974	1011.45	20.2294	1013	13.5751	0.219596	0.000434137
QLP-7_31	1171.05	32.8947	1172.2	21.8369	1174	14.1257	0.250904	0.000378663
QLP-7_32	525.435	20.3377	533.021	17.4498	565.5	27.4204	7.08493	0.00839475
QLP-7_33	1034.86	30.6005	1036.21	21.164	1039	13.7272	0.398043	0.000227153
QLP-7_34	1292.02	36.19	1304.88	23.1839	1326	13.6212	2.56251	0.000820203
QLP-7_35	1004.93	36.8636	1020.77	26.045	1055	18.4063	4.74624	0.00244952
QLP-7_36	1195.3	29.8524	1185.2	19.8003	1166.5	15.2113	-2.46878	0.000229599
QLP-7_37	1055.82	37.2697	1066.7	25.656	1089	15.5551	3.04718	0.000551624
QLP-7_38	1194.54	30.8825	1258.28	22.1024	1369	23.1763	12.7435	0.000465051
QLP-7_39	1377.75	41.5535	1405.22	25.9006	1447	13.1444	4.78588	0.000443467
QLP-7_40	1078	38.2107	1092.84	26.265	1122.5	17.1462	3.96469	0.0016452
QLP-7_41	1422.22	43.9496	1429.91	26.8352	1441	13.5157	1.30325	0.000443402
QLP-7_42	1439.58	49.6473	1450.82	30.0314	1467	13.2685	1.869	0.000545247
QLP-7_43	1044.58	42.7332	1040.41	29.0952	1031.5	15.1754	-1.26813	0.00130044
QLP-7_45	807.105	35.5027	865.072	27.5986	1016.5	18.2518	20.5996	0.000186612
QLP-7_46	974.016	32.0269	984.257	22.7472	1007	15.6002	3.27545	0.00138403
QLP-7_47	2094.21	68.4329	2108.07	34.2923	2121.5	11.6247	1.28613	0.000342231
QLP-7_48	1064.11	32.9699	1073.56	22.8666	1092.5	16.9488	2.59881	0.00375508
QLP-7_49	1470.38	41.8343	1471.17	25.242	1472	13.8095	0.110145	0.000742716
QLP-7_50	1344.14	41.9119	1369.26	26.4753	1408.5	14.7359	4.56943	0.00168716
QLP-7_51	517.797	44.2019	576.017	41.5935	812.5	72.8757	36.2711	0.000799949
QLP-7_52	1045.54	38.7355	1041.09	26.4543	1031.5	15.176	-1.36158	0.0017838
QLP-7_53	1422.04	45.3029	1433.79	27.7275	1451	14.3221	1.99573	0.000775982
QLP-7_54	1065.77	32.302	1077.55	22.3624	1101.5	15.8248	3.24372	0.00211753
QLP-7_55	1254.04	33.3557	1267.62	21.7504	1290.5	14.1994	2.82543	0.000784406
QLP-7_56	1296.8	37.4911	1307.23	23.888	1324.5	13.2331	2.09145	0.000455822
QLP-7_57	1164.51	35.4118	1185.03	23.6605	1222.5	13.9286	4.74341	0.00107364
QLP-7_58	995.782	38.382	1030.74	27.2178	1105.5	14.8787	9.92474	0.000342869
QLP-7_59	1019.86	31.7927	1029.65	22.2259	1050.5	14.8067	2.91706	0.00124509
QLP-7_60	999.889	28.2214	1012.84	20.1707	1041	16.8665	3.94922	0.00189609
4.TRAP-LPL-7— Trapiche Formation—29° 39' 48.0" S, 68° 42' 30.9" W
TRAP-LPL-7_48	602.435	26.3978	608.161	21.1847	629.5	16.003	-0.588317	0.000967212
TRAP-LPL-7_6	649.894	30.6737	655.633	24.1529	675.5	16.8855	-0.5883	0.00127034
TRAP-LPL-7_29	885.938	39.3657	895.522	28.5566	919	16.8302	-0.955231	0.0031843
TRAP-LPL-7_25	944.858	43.7321	955.704	31.0148	980.5	16.1278	-1.06669	0.00189548
TRAP-LPL-7_22	939.713	41.2166	953.399	29.3694	985	15.7551	-1.34452	0.00270987
TRAP-LPL-7_50	960.243	39.5646	970.079	27.9291	992.5	14.7955	-0.973485	0.00104395
TRAP-LPL-7_24	976.111	42.6442	981.383	29.7758	993	14.267	-0.524232	0.00119558
TRAP-LPL-7_55	959.786	39.5528	971.619	27.9367	998.5	14.3174	-1.18789	0.000969819
TRAP-LPL-7_5	950.008	42.6259	966.379	30.4807	1003.5	19.3014	-1.58647	0.00496209
TRAP-LPL-7_33	964.752	43.5565	978.197	30.7083	1008.5	15.3244	-1.25199	0.00178342
TRAP-LPL-7_52	954.672	41.5705	973.123	29.7221	1015	18.7598	-1.79587	0.00642843
TRAP-LPL-7_10	957.783	44.0123	975.592	31.2599	1015.5	17.0747	-1.73746	0.00289732
TRAP-LPL-7_51	996.075	37.8865	1003.33	26.4153	1019	14.3013	-0.713735	0.000327293
TRAP-LPL-7_13	1014.69	39.6161	1016.77	27.3411	1021	14.3419	0.617887	0.000575818
TRAP-LPL-7_59	1012.83	44.6398	1017.87	30.7849	1028.5	14.6686	1.52374	0.00101946
TRAP-LPL-7_56	1001.55	39.257	1010.38	27.4036	1029.5	15.8885	2.71456	0.00121123
TRAP-LPL-7_18	994.311	43.6394	1005.72	30.382	1030.5	14.1754	3.51183	0.00105803
TRAP-LPL-7_41	979.867	43.8949	996.191	30.7945	1032	14.3074	5.05166	0.00114307
TRAP-LPL-7_26	1027.35	42.2799	1031.92	29.0762	1041.5	14.8951	1.35821	0.00260205
TRAP-LPL-7_14	1088.88	47.5025	1073.85	31.5768	1043.5	14.1568	-4.34858	0.00076673
TRAP-LPL-7_4	1014.59	42.4752	1027.4	29.6133	1054.5	17.6347	3.78453	0.00385319
TRAP-LPL-7_16	1010.09	41.3425	1025.03	28.8621	1057	16.4585	4.43807	0.00364727
TRAP-LPL-7_30	995.695	47.976	1017.06	33.7269	1063	18.8402	6.33157	0.00355612
TRAP-LPL-7_20	1027.88	46.1494	1040.45	32.0578	1067	19.6951	3.6661	0.00464853
TRAP-LPL-7_32	1060.14	50.5333	1063.06	34.1865	1069	14.7915	0.82924	0.00175317
TRAP-LPL-7_49	1042.08	47.6607	1052.13	32.6313	1073	15.3632	2.88137	0.000964739
TRAP-LPL-7_39	1060.68	44.1273	1067.67	29.9849	1082	13.9202	1.97043	0.000538993
TRAP-LPL-7_1	1010.67	43.4578	1033.96	30.3187	1083.5	14.4765	6.72204	0.000798429
TRAP-LPL-7_57	1061.37	44.1442	1069.6	30.0118	1086.5	13.9669	2.31293	0.000926518
TRAP-LPL-7_47	1074.69	48.9552	1079.2	32.98	1088	13.8296	1.22325	0.000728815
TRAP-LPL-7_12	1022.88	48.5163	1045.35	33.6465	1092.5	15.594	6.37215	0.00241408
TRAP-LPL-7_42	1068.68	49.4432	1085.01	33.6069	1118	14.6112	4.41157	0.00104033
TRAP-LPL-7_58	1075.73	43.5043	1089.86	29.6903	1118	16.4897	3.7812	0.0020319
TRAP-LPL-7_28	1115.84	46.4976	1117.17	30.9069	1119.5	13.5613	0.326955	0.000355526
TRAP-LPL-7_3	1104.45	46.7557	1115.68	31.417	1137.5	15.0913	2.90548	0.00161488
TRAP-LPL-7_54	1090.85	42.5323	1112.16	29.0363	1154	16.646	5.47232	0.00303093
TRAP-LPL-7_19	1132.85	46.4	1140.49	30.7898	1155	13.7939	1.9176	0.000637503
TRAP-LPL-7_8	1162.43	48.6413	1160.45	31.7857	1156.5	13.5315	-0.512918	0.000285164
TRAP-LPL-7_7	1116.77	46.5199	1134.11	31.2652	1167.5	15.5653	4.34514	0.00317278
TRAP-LPL-7_21	1118.09	50.4652	1136.52	33.7978	1171.5	14.9541	4.55894	0.000660681
TRAP-LPL-7_38	1130.87	50.733	1145.09	33.7822	1172	15.2401	3.50905	0.00101374
TRAP-LPL-7_23	845.159	42.3149	941.825	32.8464	1175	13.5983	28.0716	0.000304009
TRAP-LPL-7_40	1116.1	49.8307	1137.27	33.4495	1178	14.9252	5.25503	0.00119659
TRAP-LPL-7_31	1157.46	50.1543	1164.97	32.9433	1179	13.5531	1.82674	0.000338542
TRAP-LPL-7_43	845.295	60.183	955.257	46.8332	1217.5	15.0479	30.5713	0.000345973
TRAP-LPL-7_15	1082.28	45.1713	1128.32	31.0414	1218	13.3095	11.1425	0.000509251
TRAP-LPL-7_37	1006.05	58.0444	1079.79	41.4578	1231.5	16.2183	18.3071	0.000334651
TRAP-LPL-7_53	1186.96	48.2121	1206.7	31.6835	1242	15.2291	4.43135	0.001352
TRAP-LPL-7_45	1214.94	54.2382	1225.27	35.0165	1243.5	14.415	2.29677	0.000987703
TRAP-LPL-7_34	1266.65	53.6516	1286.55	34.2124	1320	13.9298	4.04164	0.000527212
TRAP-LPL-7_27	1292.69	55.8462	1305.53	35.2054	1326.5	14.1281	2.54911	0.0016305
TRAP-LPL-7_60	1290.6	51.2064	1313.2	32.4728	1350	13.5502	4.3998	0.000682366
TRAP-LPL-7_9	1370.46	60.7999	1368.56	37.1484	1365.5	13.7896	-0.363164	0.00157665
TRAP-LPL-7_17	1292.8	55.8485	1327.17	35.4383	1383	13.1728	6.52211	0.000549493
TRAP-LPL-7_11	1243.2	59.04	1304.8	38.4644	1407.5	14.3006	11.673	0.000225598
TRAP-LPL-7_36	1416.79	57.9841	1430.53	35.1279	1451	12.8104	2.35768	0.00027591
TRAP-LPL-7_46	1426.55	64.7557	1444.37	39.1681	1470.5	14.7813	2.98905	0.00142985
TRAP-LPL-7_35	1434.2	60.9478	1455.47	36.7988	1486.5	13.2659	3.51826	0.000738018
TRAP-LPL-7_44	1622.43	60.9086	1654.65	35.0359	1695.5	14.5354	4.30979	0.000306601
TRAP-LPL-7_2	1742.12	64.512	1796.7	35.8601	1860.5	12.7462	6.36268	0.0010478
5.TRAP-6— Trapiche Formation—29° 43' 34" S, 68° 43' 26" W
TRAP-6_9	572.131	14.3531	586.974	12.4161	644.5	20.6544	-1.50675	0.000972753
TRAP-6_2	606.731	20.8873	616.86	16.7195	654	8.44494	-0.972932	0.00029986
TRAP-6_32	526.014	9.74237	573.941	9.10377	768.5	16.4221	-4.59575	0.000711779
TRAP-6_17	820.583	18.1189	817.212	13.3451	808	8.14013	0.324504	0.000371684
TRAP-6_44	507.082	12.7859	566.012	13.694	810.5	37.0912	-5.71552	0.00102252
TRAP-6_50	892.872	25.2897	891.915	18.2137	889.5	10.9953	0.141413	0.00022185
TRAP-6_30	994.053	28.3746	993.017	19.5793	990.5	7.48701	0.0967825	0.00019901
TRAP-6_45	933.907	23.3054	952.11	16.8708	994.5	11.4948	-1.73301	0.000323312
TRAP-6_1	967.01	24.3428	983.022	17.2791	1019	9.71024	5.10211	0.000690803
TRAP-6_13	959.285	27.3568	979.103	19.3963	1023.5	8.64894	6.27404	0.000282358
TRAP-6_4	963.167	27.3574	985.106	19.5238	1034	11.2433	6.85034	0.000910763
TRAP-6_34	1043.6	37.5524	1041.11	25.6859	1035.5	14.5858	-0.781853	0.000751987
TRAP-6_8	1039.77	27.3819	1042.85	18.7013	1049	8.04825	0.879609	0.000322131
TRAP-6_26	1034	39.6564	1039.01	26.972	1049.5	7.5698	1.47716	0.00034645
TRAP-6_10	1021.12	28.3753	1031.05	19.8862	1052	13.8824	2.93503	0.000806341
TRAP-6_12	568.81	23.1119	676.208	21.2619	1052.5	16.7041	45.9563	0.00058073
TRAP-6_15	1076.54	24.4989	1070.44	16.426	1058	6.28399	-1.75214	8.46726e-05
TRAP-6_47	1036.69	25.4092	1050.34	17.5481	1078.5	8.90775	3.87656	0.000466053
TRAP-6_6	1058.73	31.3865	1068.13	21.4016	1087	9.87692	2.60071	0.000719564
TRAP-6_46	1044.53	29.3788	1059.11	20.0651	1089	6.32936	4.08352	0.000114489
TRAP-6_23	1066.77	39.5631	1079.82	27.2587	1106	17.8255	3.54731	0.00116843
TRAP-6_27	1096.58	32.3647	1101.89	21.6245	1112	7.13899	1.38662	0.000218193
TRAP-6_37	1099.28	52.9783	1113.48	35.5144	1141	13.6997	3.65677	0.000457105
TRAP-6_38	1179.04	40.2804	1166.79	25.9956	1144	9.09324	-3.06256	0.000150253
TRAP-6_21	805.557	17.0994	904.242	13.7527	1153.5	9.04851	30.1641	0.000286034
TRAP-6_49	1127.09	31.349	1137.96	20.8012	1158.5	6.9127	2.71137	0.000201368
TRAP-6_42	1146.4	31.3415	1151.32	20.7324	1160.5	9.49589	1.21487	0.000437113
TRAP-6_41	1150.74	33.3159	1156.25	21.8484	1166.5	6.52763	1.35085	0.000163491
TRAP-6_35	1149.6	35.3116	1159.07	23.1771	1176.5	6.16265	2.28676	0.000141337
TRAP-6_16	1234.28	36.1811	1215.24	22.9049	1181.5	8.00088	-4.46687	0.000403187
TRAP-6_33	1151.14	29.3863	1161.97	19.5259	1182	9.86815	2.61097	0.000641766
TRAP-6_28	631.453	39.9849	766.593	36.6839	1183.5	34.1314	46.6453	0.000797976
TRAP-6_31	1175.66	35.2748	1182.69	23.2032	1195.5	11.7537	1.65977	0.000415153
TRAP-6_25	1204.38	34.2524	1201.96	22.179	1197.5	10.2664	-0.574314	0.000570223
TRAP-6_22	685.262	12.9941	818.699	32.5161	1200.5	107.997	42.9186	0.00187473
TRAP-6_14	1128.3	33.3372	1156.47	22.2924	1209.5	7.46249	6.71375	0.000333101
TRAP-6_18	1111.13	27.426	1152.13	18.6268	1230	7.39225	9.66412	0.0003792
TRAP-6_3	1173.67	33.296	1194.98	21.9487	1233.5	9.13599	4.85074	0.000462678
TRAP-6_7	1117.9	38.4043	1163.35	27.7982	1249	29.6206	10.4965	0.00123646
TRAP-6_48	1183.16	28.4399	1213.81	18.7721	1268.5	7.67344	6.7279	0.00032181
TRAP-6_5	1249.61	39.1116	1263.57	24.9317	1287.5	7.60407	2.94328	0.000400059
TRAP-6_29	1291.06	33.2237	1293.69	20.8411	1298	6.7056	0.534582	0.000246982
TRAP-6_19	1267.84	37.1106	1297.2	25.4485	1346	25.8955	5.8065	0.000922433
TRAP-6_11	1294.76	29.4631	1318.35	18.7373	1357	8.15446	4.58661	0.000362459
TRAP-6_36	1317.28	30.4045	1340.6	19.1121	1378	6.9149	4.40655	0.000335011
TRAP-6_43	1420.27	37.8484	1405.45	22.7036	1383	7.65531	-2.69503	0.000380574
TRAP-6_20	1415.95	46.477	1435.99	28.1807	1465.5	8.87859	3.38085	0.000651445
TRAP-6_39	1871.22	55.7873	1945	29.7308	2024.5	5.9942	7.57113	0.000190759
TRAP-6_24	2056.25	49.001	2058.68	24.6131	2061	5.90511	0.230468	0.000179535
TRAP-6_40	2150.93	57.1057	2618.15	29.9836	3002.5	12.1265	28.3622	5.86407e-05
6.TRAP-3— Trapiche Formation—29° 50' 30" S, 68° 45' 52" W
TRAP3_40	531.208	18.8567	530.882	15.7945	529.5	22.039	0.0312189	6.08217e-05
TRAP3_41	546.837	16.1983	543.986	13.6804	532	22.5933	0.272333	5.46129e-05
TRAP3_28	982.912	31.0693	978.718	22.295	969	21.3466	0.402903	5.08797e-05
TRAP3_18	991.76	28.523	986.872	20.5312	976	20.7572	0.472798	0.000136499
TRAP3_7	1024.17	29.8631	1019.21	21.2043	1008.5	20.3964	-1.55397	3.89975e-05
TRAP3_43	1025.61	29.885	1022.42	21.2863	1015.5	20.9347	-0.995672	6.06837e-05
TRAP3_47	1011.29	29.6672	1014.89	21.3069	1022.5	20.9473	1.09651	0.000141039
TRAP3_20	1045.64	30.1915	1040.43	21.3244	1029.5	20.5913	-1.56805	0.000154555
TRAP3_42	1013.86	30.5806	1019.74	22.0389	1032	22.2139	1.75734	0.000433124
TRAP3_36	1045.04	33.8074	1042.68	23.7724	1037.5	21.6242	-0.726477	0.000255562
TRAP3_39	1045.16	31.0367	1042.72	21.8999	1037.5	20.5795	-0.737889	7.95444e-05
TRAP3_48	1051.54	32.0165	1047.24	22.4687	1038	20.5954	-1.30434	9.50896e-05
TRAP3_29	1041.69	31.8786	1041.1	22.8943	1039.5	24.6307	-0.210319	0.000181771
TRAP3_8	1029.33	30.8053	1033.88	21.8819	1043.5	20.1184	1.35827	5.06339e-05
TRAP3_5	1058.13	31.2275	1058.03	21.9781	1057.5	20.524	-0.0597257	6.78606e-05
TRAP3_2	1040.55	32.7909	1048.42	23.1653	1064.5	20.3361	2.24985	3.89611e-05
TRAP3_1	1041.6	31.8775	1049.21	22.6534	1065	21.2471	2.19693	0.000272948
TRAP3_25	1076.57	30.6688	1074.4	21.6619	1070	22.0069	-0.614304	0.000294026
TRAP3_10	1070.21	37.1149	1071	25.6824	1072.5	20.5324	0.213111	7.52797e-05
TRAP3_11	1103.37	32.7512	1093.13	22.67	1072.5	21.4579	-2.87806	5.59466e-05
TRAP3_26	1080.58	39.3245	1081.04	27.0031	1082	20.2991	0.131441	3.81202e-05
TRAP3_45	1096.14	39.4771	1097.65	27.0427	1100.5	20.7719	0.396486	5.57566e-05
TRAP3_16	1106.87	33.6855	1105.54	23.3307	1103	21.3121	-0.351083	0.00013822
TRAP3_50	1096.52	30.9788	1100.32	21.6827	1107.5	20.6309	0.99172	6.92334e-05
TRAP3_24	1047.49	27.3903	1067.87	19.781	1109.5	20.0615	5.58915	0.000107506
TRAP3_30	1125.09	34.8404	1122.8	23.9296	1118	21.2472	-0.634405	0.000246915
TRAP3_17	1170.93	41.2617	1162.85	27.443	1147.5	20.132	-2.04225	6.58332e-05
TRAP3_32	1159.47	35.2962	1157.06	23.8767	1152.5	19.8909	-0.604821	4.35796e-05
TRAP3_3	1151.58	31.1008	1152.51	21.426	1154	20.3659	0.209403	0.00015274
TRAP3_38	1165.85	35.3816	1162.48	23.8768	1156	19.853	-0.85218	8.92371e-05
TRAP3_6	1167.24	36.3082	1166.06	24.4682	1163.5	19.8791	-0.321328	9.83845e-05
TRAP3_22	1090.07	30.0967	1114.85	21.4037	1163.5	20.6158	6.31139	9.58323e-05
TRAP3_34	1166.04	32.0726	1167.15	22.0524	1169	21.2504	0.253571	0.000163673
TRAP3_44	1197.61	37.6166	1196.42	25.1322	1194	20.3534	-0.301977	0.000253853
TRAP3_21	1206.3	36.812	1203.84	24.5426	1199.5	20.0332	-0.566847	2.55158e-05
TRAP3_14	1222.73	33.7178	1233.37	22.7347	1252	20.169	2.33784	0.000125402
TRAP3_27	1271.56	36.8261	1270.67	24.3904	1269	21.7765	-0.202124	0.000145313
TRAP3_13	1266.05	37.5986	1270.57	24.6857	1278	19.5813	0.935157	7.96216e-05
TRAP3_46	1178.94	45.601	1218.26	30.716	1288.5	19.9439	8.5028	0.000145115
TRAP3_4	1303.62	37.2743	1305.83	24.2249	1309.5	19.3736	0.448993	5.97907e-05
TRAP3_19	1253.04	34.948	1274.12	25.9873	1309.5	36.5028	4.31158	0.000249451
TRAP3_35	1333.73	39.3496	1339.11	25.3298	1347.5	19.7008	1.02169	0.000114874
TRAP3_15	1310.54	46.68	1328.84	29.9613	1358.5	19.6351	3.53023	5.87489e-05
TRAP3_12	1440.12	41.5728	1429.43	25.7818	1413.5	19.4577	-1.88316	8.91909e-05
TRAP3_9	1448.59	42.5125	1440.49	26.2495	1428.5	19.187	-1.40634	0.00012377
TRAP3_49	943.043	33.6135	1104.15	26.7801	1437	21.8991	34.3742	0.00111643
TRAP3_23	1393.88	47.4239	1411.54	29.6754	1438	19.0786	3.06803	3.17507e-05
TRAP3_33	1446.18	44.2127	1448.69	27.3551	1452	19.5028	0.400719	0.000182528
TRAP3_37	1505.62	40.1825	1510	24.7829	1516	19.6269	0.684738	0.000119456
TRAP3_31	1740.95	50.9223	1802.98	29.2292	1875.5	18.0204	7.17435	7.10136e-05
7.TRAP-1— Trapiche Formation—29° 50' 34" S, 68° 45' 42" W
TRAP-1_4	558.995	28.013	557.405	22.7526	550.5	22.036	0.15919	0.00152166
TRAP-1_17	552.744	24.61	557.57	20.3324	577	22.3325	-0.487586	0.00124216
TRAP-1_13	624.559	29.5361	627.655	23.6229	638.5	22.3618	-0.318932	0.00158532
TRAP-1_6	651.145	31.9615	660.693	26.2935	693	36.8612	-0.943071	0.00192493
TRAP-1_39	669.235	31.9833	676.594	25.1087	701	18.872	-0.698794	0.00113655
TRAP-1_7	630.148	31.3246	647.579	25.6167	708.5	27.6712	-1.62409	0.000763924
TRAP-1_12	789.052	39.4054	785.17	29.2832	774	19.4811	0.336519	0.000372762
TRAP-1_1	952.769	44.6659	946.649	31.3177	932.5	17.8223	0.573861	0.00103983
TRAP-1_10	1076.05	45.5569	1047.36	30.7995	988	23.626	2.53525	0.00356213
TRAP-1_2	1020.93	45.7657	1012.99	31.3563	995.5	17.3106	0.724149	0.000439416
TRAP-1_25	993.622	46.3564	998.421	32.4152	1009	20.2326	1.52404	0.000913718
TRAP-1_45	977.707	48.0136	989.862	33.7803	1016.5	19.2015	3.8163	0.00109697
TRAP-1_60	945.094	43.461	970.593	31.211	1029	18.0568	8.10952	0.000644168
TRAP-1_48	999.503	44.2425	1012.4	30.9216	1040	17.2804	3.89396	0.000419176
TRAP-1_26	1051.93	45.89	1053.06	31.3626	1055.5	18.1844	0.338291	0.000427877
TRAP-1_31	1068.74	48.1009	1073.29	32.702	1082.5	18.0729	1.27123	0.000706624
TRAP-1_20	1190.03	59.6313	1153.56	38.0417	1085.5	17.6182	-9.63007	0.000256207
TRAP-1_43	1056.94	48.2088	1066.4	32.9472	1085.5	17.5589	2.63148	0.000914679
TRAP-1_56	1155.75	49.1691	1131.96	32.1214	1086.5	18.3036	-6.37411	0.00117933
TRAP-1_30	1100.87	48.2203	1096.7	32.3063	1088.5	17.8178	-1.13634	0.00067283
TRAP-1_29	1109.86	51.6551	1102.84	34.4931	1089	19.7498	-1.91567	0.00226449
TRAP-1_32	1164.14	60.7953	1138.93	39.2734	1091	18.039	-6.70423	0.000977393
TRAP-1_46	1064.67	50.9164	1075.88	34.6623	1098.5	17.2217	3.07965	0.00047475
TRAP-1_52	1073.35	49.1597	1083.97	33.5944	1105	20.3247	2.86382	0.00241216
TRAP-1_54	1099.91	52.9259	1103.05	35.5859	1109	19.6346	0.819303	0.00102147
TRAP-1_18	1137.37	50.1623	1134.07	33.627	1127.5	23.6073	-0.87525	0.00511423
TRAP-1_23	1170.76	53.846	1157.86	35.0337	1133.5	17.4466	-3.28715	0.000702657
TRAP-1_22	1161.29	50.0866	1151.97	32.8068	1134.5	17.2212	-2.36113	0.000746341
TRAP-1_3	1170.14	51.1517	1159.52	33.3971	1139.5	17.6258	-2.68856	0.000410789
TRAP-1_50	1125.75	48.5969	1135.46	32.4746	1154	16.8174	2.44762	0.000225476
TRAP-1_19	1170.89	52.0174	1165.23	34.0085	1154.5	17.5696	-1.41991	0.000578198
TRAP-1_58	1169.76	51.5559	1170.1	33.775	1170	16.7712	0.0628272	0.000401965
TRAP-1_28	1275.75	52.353	1242.6	32.8099	1185.5	17.1396	-7.61245	0.000394093
TRAP-1_5	1250.5	52.1688	1230.74	33.0781	1196	16.6411	-4.5569	0.000250928
TRAP-1_53	1196.87	52.3663	1199.12	34.2393	1203	19.7114	0.50945	0.000708
TRAP-1_35	1229.48	52.5685	1222.69	33.8498	1210.5	18.7848	-1.56829	0.000586067
TRAP-1_59	1080.39	50.3308	1125	35.3324	1212	26.1117	10.8588	0.00169194
TRAP-1_14	1202.3	53.3733	1209.55	34.7419	1222.5	17.5192	1.65235	0.000575334
TRAP-1_21	1286.29	55.8363	1284.6	35.4222	1281.5	19.546	-0.373499	0.00150972
TRAP-1_37	1305.86	53.9205	1301.08	33.8834	1293	17.4574	-0.994343	0.000607235
TRAP-1_36	1143.53	54.0947	1200.42	37.3819	1304	27.1005	12.306	0.000498912
TRAP-1_40	1499.44	62.4808	1426.59	36.1559	1319.5	16.7435	-13.6372	0.000627549
TRAP-1_8	1385.48	58.3961	1361.34	35.4683	1323.5	16.6172	-4.68303	0.000305852
TRAP-1_57	1335.39	56.1704	1336.88	35.1832	1339	19.4952	0.269608	0.00215694
TRAP-1_16	1365.98	57.4521	1356.23	35.4766	1340.5	19.2005	-1.90085	0.000927945
TRAP-1_49	1359.16	57.6102	1362.61	35.6184	1368	16.6688	0.646139	0.00031545
TRAP-1_24	1427.81	60.7561	1405.41	36.4442	1371.5	16.5442	-4.10544	0.000746185
TRAP-1_38	1423.79	57.6421	1403.36	34.7065	1372.5	16.513	-3.73731	0.000612907
TRAP-1_47	1263.43	55.5824	1305.79	35.9504	1376	17.1465	8.18068	0.000808682
TRAP-1_27	1407.07	57.4071	1394.96	34.8348	1376.5	16.6278	-2.22078	0.000480264
TRAP-1_9	1432.52	62.0767	1410.69	37.1647	1377.5	16.5286	-3.9945	0.000578888
TRAP-1_41	1381.67	61.9721	1382.4	38.0921	1383.5	18.9549	0.132081	0.00059965
TRAP-1_33	1418.51	61.6833	1405.62	37.1588	1386	16.0498	-2.34557	0.000142358
TRAP-1_34	1397.07	61.0821	1393.53	37.1955	1388	16.7606	-0.653102	0.000471262
TRAP-1_15	1423.59	59.5346	1411.93	36.1104	1394	19.1704	-2.12248	0.00106953
TRAP-1_55	1491.96	62.9858	1480.65	37.1765	1464.5	16.0349	-1.8753	0.000232172
TRAP-1_44	1669.88	77.6899	1748.2	50.6434	1843	56.5064	9.39329	0.000903506
TRAP-1_42	1961.79	78.497	1906.8	40.3085	1847.5	15.4677	-6.18597	0.000300681
TRAP-1_11	2019.36	86.1438	1939.58	43.3095	1855.5	15.6478	-8.83098	0.00039178
TRAP-1_51	1990.54	77.0238	2012.63	39.7909	2035.5	14.9607	2.20901	0.000338159
8.LV-LPL-3—Las Vacas Conglomerate—29° 39' 37.7" S, 68° 42' 06.1" W
LV-LPL-3_40	518.784	34.2602	529.661	29.7698	576.5	50.6044	-1.00942	0.0013453
LV-LPL-3_27	705.752	47.5682	709.869	36.2563	722.5	14.7404	-0.396716	0.000527749
LV-LPL-3_28	695.962	43.0424	721.502	35.4909	801.5	48.3771	-2.49672	0.00135339
LV-LPL-3_5	885.599	55.6601	907.339	40.2625	960.5	14.4628	-1.9361	0.000678477
LV-LPL-3_38	1076.72	76.1329	1046.01	49.8432	982.5	13.2281	-9.58958	0.000254429
LV-LPL-3_8	948.711	58.6709	970.662	41.597	1020.5	17.8297	7.03469	0.00363175
LV-LPL-3_23	955.288	58.2647	975.553	41.1294	1021.5	16.4921	6.48182	0.00104706
LV-LPL-3_22	980.284	65.137	995.056	45.5651	1027.5	22.2173	4.59519	0.00143717
LV-LPL-3_3	894.952	54.0375	936.374	41.3185	1035	43.1841	13.5312	0.002176
LV-LPL-3_24	997.342	62.0836	1013.43	42.9216	1048	12.9879	4.83377	0.000298087
LV-LPL-3_19	1075.4	68.8175	1077.49	46.1068	1081.5	17.8242	0.563791	0.000703141
LV-LPL-3_2	1009.82	61.6231	1037.75	42.7505	1097	14.2189	7.9471	0.000922058
LV-LPL-3_11	981.285	60.1205	1022.91	42.6605	1113	18.9258	11.8342	0.00153979
LV-LPL-3_15	1118.61	67.774	1122.87	44.715	1131	14.0776	1.09578	0.000392451
LV-LPL-3_35	1031.94	74.2858	1069.7	51.4381	1147.5	19.9975	10.0703	0.00168025
LV-LPL-3_1	1075.56	64.4633	1100.24	43.5781	1149	13.0674	6.39193	0.000168665
LV-LPL-3_17	947.134	58.0643	1016.27	42.1986	1168	13.1057	18.9098	0.000297833
LV-LPL-3_25	927.683	58.848	1002.27	43.2258	1169	13.1016	20.6431	0.000297746
LV-LPL-3_9	1026.7	61.6876	1073.85	46.5731	1170.5	56.2405	12.2856	0.00466875
LV-LPL-3_10	774.151	58.6685	884.199	47.3073	1170.5	17.1732	33.8615	0.000344845
LV-LPL-3_4	1083.18	65.0516	1113.17	44.2097	1172	18.8718	7.57885	0.00150491
LV-LPL-3_18	1176.21	76.043	1176.68	49.0583	1177.5	13.5994	0.109373	0.000838596
LV-LPL-3_16	1119.73	67.3734	1140.36	44.7733	1179.5	13.5935	5.06746	0.000973425
LV-LPL-3_14	1100.75	69.2953	1128.02	46.4467	1181	13.0383	6.79536	0.000837079
LV-LPL-3_12	1107.88	66.0067	1135.55	44.3421	1188.5	17.0474	6.78323	0.00165093
LV-LPL-3_37	1122.04	66.514	1152.8	44.3617	1211	12.7888	7.3464	0.000257652
LV-LPL-3_20	1259.54	81.5514	1244.7	51.246	1219	21.5856	-3.32587	0.0036802
LV-LPL-3_13	1186.14	70.4437	1202.04	45.81	1230.5	16.7577	3.60481	0.00136224
LV-LPL-3_36	1108.26	67.7628	1157.21	45.9617	1250	17.4088	11.3392	0.000797817
LV-LPL-3_33	1209.74	74.9634	1229.03	48.2022	1263	12.0397	4.2167	0.000188311
LV-LPL-3_34	1246.5	73.741	1270.15	47.9694	1310.5	29.2828	4.88338	0.000224026
LV-LPL-3_6	1200.81	73.2759	1241.26	47.7462	1312	13.6455	8.47515	0.0009547
LV-LPL-3_30	1282.53	78.8126	1297.7	49.6473	1322.5	18.0422	3.0221	0.000276017
LV-LPL-3_21	1112.7	67.4695	1189.84	46.441	1332.5	20.4019	16.4953	0.00069185
LV-LPL-3_31	1356.96	84.3878	1365.92	51.5684	1380	13.6478	1.66963	0.000624177
LV-LPL-3_39	1439.47	87.222	1416.37	51.5152	1381.5	15.4531	-4.19624	0.000263915
LV-LPL-3_7	1372.4	84.4034	1389.25	51.4411	1415	12.7934	3.01079	0.00044619
LV-LPL-3_32	1370.12	83.0193	1394.38	50.811	1431.5	13.7083	4.28812	0.000536409
LV-LPL-3_26	1343.16	82.6927	1409.58	51.7194	1511.5	12.5006	11.137	0.000317282
LV-LPL-3_29	2112.29	118.481	2130.4	59.2253	2148	23.6645	1.6625	0.000484498
9.LV-LV-2.5—Las Vacas Conglomerate—29° 41' 25.7" S, 68° 39' 47.6" W
LV-LV-2.5_30	537.003	23.8194	533.086	20.219	516	35.3435	0.380977	0.000720716
LV-LV-2.5_18	633.217	27.1871	645.965	24.1132	690.5	49.518	-1.25046	0.00119181
LV-LV-2.5_37	920.838	41.3504	921.534	30.1546	923	28.0172	-0.0662489	0.000187736
LV-LV-2.5_50	937.795	43.0929	940.136	31.6361	945.5	32.8821	-0.227588	0.0267837
LV-LV-2.5_19	990.468	42.7618	989.802	30.3864	988	26.3309	0.0649569	0.000140586
LV-LV-2.5_16	1003.42	43.6681	1002.77	30.9236	1001	26.8858	-0.241827	0.000261527
LV-LV-2.5_22	1013.31	44.4943	1009.61	31.4021	1001.5	27.7951	-1.17918	-0.000685674
LV-LV-2.5_2	1020.6	43.2261	1020.88	30.4567	1021.5	26.1508	0.0881152	-0.000137835
LV-LV-2.5_13	1037.05	46.927	1033.93	32.6898	1027	26.5691	-0.978746	0.000115902
LV-LV-2.5_21	1022.49	43.5195	1024.08	30.8601	1027.5	28.4563	0.487967	0.000794534
LV-LV-2.5_36	1026.77	43.8292	1028.31	30.8311	1031.5	26.2568	0.45864	8.89521e-05
LV-LV-2.5_48	1013.43	47.4365	1019.47	33.4532	1032.5	27.132	1.84738	-0.000253112
LV-LV-2.5_24	1059.26	45.1733	1051.32	31.2551	1034.5	26.1111	-2.39341	0.00457362
LV-LV-2.5_4	1023.01	43.9034	1028.39	31.0934	1039.5	27.5672	1.58612	0.000224248
LV-LV-2.5_6	1018.26	43.7366	1025.58	30.9076	1041	25.8106	2.18492	0.000180426
LV-LV-2.5_3	1029.21	45.5475	1034.85	32.0203	1046.5	26.4736	1.65186	0.000267504
LV-LV-2.5_43	1037.6	48.855	1041.64	34.0124	1050	25.7978	1.18123	2.20933e-05
LV-LV-2.5_20	1029.2	43.4973	1037.01	31.454	1053.5	33.8196	2.30663	0.000437179
LV-LV-2.5_46	1057.63	47.5937	1056.58	32.9188	1054	25.8022	-0.344305	4.45897e-05
LV-LV-2.5_31	1035.49	45.2496	1043.42	31.7605	1060	25.8101	2.31224	2.98127e-05
LV-LV-2.5_29	1096.92	47.3416	1087.87	32.2854	1069.5	25.8228	-2.56375	0.000159187
LV-LV-2.5_17	1032.66	44.679	1044.83	32.5984	1070	36.8159	3.48976	0.000645403
LV-LV-2.5_23	1094.82	48.2586	1086.6	32.9088	1070	25.966	-2.31946	0.000155756
LV-LV-2.5_38	943.567	137.624	984.765	97.371	1077.5	27.108	12.43	0.000622041
LV-LV-2.5_26	1095.78	46.8592	1091.07	32.1236	1081.5	26.4773	-1.32017	0.000194389
LV-LV-2.5_14	1041.28	44.1106	1057.84	31.7376	1092	32.1194	4.64431	0.0196175
LV-LV-2.5_7	1080.64	45.8427	1086.44	31.777	1098	26.3948	1.58105	0.000353165
LV-LV-2.5_5	1118.68	46.5583	1122.29	32.0158	1129	27.7794	0.914076	0.000674973
LV-LV-2.5_40	1112.32	49.9339	1124.9	34.1364	1149	25.4434	3.19276	5.03142e-05
LV-LV-2.5_49	1161.86	57.5348	1161.16	38.1898	1159.5	25.3411	-0.203148	0.000117567
LV-LV-2.5_9	1157.08	49.837	1161.37	33.6195	1169	26.4116	1.01975	0.000363816
LV-LV-2.5_11	1180.37	49.3274	1178.01	33.0847	1173.5	27.2473	-0.585604	0.000682668
LV-LV-2.5_10	1150.46	50.6119	1159.94	34.6138	1177.5	30.1597	2.29661	0.000316929
LV-LV-2.5_35	1160.24	51.4691	1168.29	34.6159	1183	25.836	1.92417	0.000145101
LV-LV-2.5_25	1205.65	50.6406	1199.71	33.469	1189	25.6802	-1.40008	0.000311398
LV-LV-2.5_15	1218.76	52.357	1213.88	34.3712	1205	25.2001	-1.14228	4.18917e-05
LV-LV-2.5_32	1187.8	51.333	1194.6	34.2112	1207	25.2889	1.59107	2.46437e-05
LV-LV-2.5_33	1187.8	51.333	1194.6	34.2112	1207	25.2889	1.59107	2.46437e-05
LV-LV-2.5_41	1203.74	51.8602	1209.72	34.4281	1220	25.8204	1.33274	4.24558e-05
LV-LV-2.5_42	1139.59	52.6246	1174.78	36.5324	1240	31.3142	8.09763	0.000262958
LV-LV-2.5_27	1273.56	53.7377	1273.04	34.8733	1272	26.0741	-0.122548	0.000191496
LV-LV-2.5_1	1173.53	50.8613	1210.49	34.8342	1277	28.3944	8.10228	0.000396641
LV-LV-2.5_47	1289.72	57.7976	1296.33	37.2893	1307	26.4759	1.32217	0.000127012
LV-LV-2.5_39	1362.52	58.4426	1362.98	36.7409	1363.5	24.9564	0.0718176	6.94676e-05
LV-LV-2.5_8	1370.88	57.3738	1370.03	36.0302	1368.5	24.9924	-0.174185	-0.000164412
LV-LV-2.5_44	1374.39	60.3677	1380.95	37.819	1391	24.8466	1.194	9.7833e-05
LV-LV-2.5_34	1418.24	60.6837	1421.28	37.5183	1425.5	24.7152	0.509354	0.000114914
LV-LV-2.5_28	1436.21	59.5168	1432.44	36.6375	1426.5	25.0513	-0.680529	0.000650237
LV-LV-2.5_45	1425.91	63.0356	1427.86	38.8356	1430.5	25.317	0.320585	0.00027973
LV-LV-2.5_12	1849.88	73.1052	1851.92	39.9459	1854	23.2833	0.22211	0.000423686
10.LV-LP-1.3—Las Vacas Conglomerate—29° 38' 33.0" S, 68° 43' 12.2" W
LV-LP-1.3_4	518.124	15.8718	508.978	20.3276	471.15	58.0379	-9.97014	n.r.
LV-LP-1.3_42	610.68	38.1516	595.006	45.7134	547.927	110.996	-11.4527	n.r.
LV-LP-1.3_57	627.461	40.2411	628.512	48.2323	603.779	110.808	-3.92214	n.r.
LV-LP-1.3_118	630.182	33.78	629.305	39.567	626.236	69.4289	-0.630071	n.r.
LV-LP-1.3_83	649.058	41.0864	648.271	43.7358	645.612	68.8181	-0.533645	n.r.
LV-LP-1.3_30	550.67	32.8323	581.74	43.216	655.607	51.3558	16.006	n.r.
LV-LP-1.3_46	630.676	38.1149	633.076	47.3446	662.088	109.892	4.74446	n.r.
LV-LP-1.3_120	574.871	30.6802	593.127	37.5133	663.675	67.4317	13.3807	n.r.
LV-LP-1.3_34	729.057	46.5351	719.463	56.5304	678.288	65.3127	-7.48485	n.r.
LV-LP-1.3_107	652.016	34.6992	665.71	41.1567	712.436	68.9138	8.4807	n.r.
LV-LP-1.3_70	624.26	37.1487	645.787	42.5092	721.879	69.6393	13.5229	n.r.
LV-LP-1.3_59	785.27	48.4638	794.877	56.1221	781.401	108	-0.495105	n.r.
LV-LP-1.3_78	955.692	54.5019	951.622	55.6014	942.3	72.6882	-1.42123	n.r.
LV-LP-1.3_95	947.215	58.7216	946.791	57.6321	945.884	72.5623	-0.140689	n.r.
LV-LP-1.3_106	971.886	50.6798	965.46	51.8812	950.936	63.8189	-2.20305	n.r.
LV-LP-1.3_12	944.981	27.6645	976.249	31.6412	961.263	53.7728	1.6938	n.r.
LV-LP-1.3_35	1011.5	61.6027	991.036	63.7595	970.623	50.6187	-4.2109	n.r.
LV-LP-1.3_104	971.625	52.2092	971.694	53.095	971.927	64.9497	0.0311022	n.r.
LV-LP-1.3_71	963.433	56.1041	967.446	54.9448	976.652	64.654	1.35358	n.r.
LV-LP-1.3_41	981.384	58.3636	994.153	64.3779	995.046	106.788	1.37308	n.r.
LV-LP-1.3_73	987.037	60.7175	989.734	57.4115	995.795	64.9246	0.879455	n.r.
LV-LP-1.3_75	1000.85	60.4722	999.733	57.3343	997.372	65.3041	-0.348331	n.r.
LV-LP-1.3_77	982.97	60.17	988.912	57.1125	1002.2	64.335	1.91879	n.r.
LV-LP-1.3_76	1010.01	60.1951	1008.94	57.0536	1006.7	64.2945	-0.328998	n.r.
LV-LP-1.3_68	1001.26	59.5173	1004.25	57.0326	1010.86	65.2669	0.949159	n.r.
LV-LP-1.3_15	1007.92	29.9903	1022.28	32.8196	1014.13	53.5819	0.611984	n.r.
LV-LP-1.3_93	999.441	51.2822	1004.55	52.7955	1015.79	63.2932	1.60914	n.r.
LV-LP-1.3_5	969.596	28.793	975.95	31.514	1019.94	51.7055	4.9358	n.r.
LV-LP-1.3_63	1009.84	58.0393	1013.44	56.2577	1021.29	64.5266	1.1212	n.r.
LV-LP-1.3_40	1029.45	60.4855	1033.31	64.9315	1023.79	103.046	-0.552703	n.r.
LV-LP-1.3_3	1005.84	28.7312	1011.68	31.0855	1025.83	48.4564	1.94918	n.r.
LV-LP-1.3_52	1044.42	58.8994	1039.4	62.7698	1027.5	96.2706	-1.64709	n.r.
LV-LP-1.3_62	1049.07	60.3557	1042.41	57.0762	1028.53	63.5674	-1.99735	n.r.
LV-LP-1.3_50	1075.83	60.6727	1068.92	63.7496	1030.55	95.8204	-4.39444	n.r.
LV-LP-1.3_82	1001.77	55.0103	1011.85	54.6689	1033.82	63.068	3.09995	n.r.
LV-LP-1.3_18	1011.17	57.8325	1034.54	63.3251	1034.41	49.1669	2.24606	n.r.
LV-LP-1.3_119	967.47	50.3251	990.31	52.5747	1041.34	62.8628	7.09361	n.r.
LV-LP-1.3_97	1016.08	52.0634	1024.32	53.2038	1042.05	62.2774	2.49153	n.r.
LV-LP-1.3_103	1017.53	53.7045	1025.43	53.9774	1042.39	62.3888	2.38456	n.r.
LV-LP-1.3_108	1033.94	53.8345	1037.33	54.4729	1044.57	64.1924	1.01762	n.r.
LV-LP-1.3_101	1009.3	51.9629	1020.61	53.7995	1045.02	64.7587	3.41791	n.r.
LV-LP-1.3_74	1008.11	57.8761	1021.16	56.4208	1049.32	64.0469	3.92787	n.r.
LV-LP-1.3_19	1054.1	61.6303	1046.16	64.5843	1051.2	49.547	-0.275652	n.r.
LV-LP-1.3_80	1101.6	60.4541	1086.07	57.7939	1055.14	65.7653	-4.40292	n.r.
LV-LP-1.3_79	1046.45	61.6922	1051.44	59.3367	1061.9	68.6579	1.45444	n.r.
LV-LP-1.3_109	1059.93	54.4933	1060.73	54.5818	1062.44	62.7187	0.235945	n.r.
LV-LP-1.3_51	1084.59	61.4464	1079.65	64.7871	1065.75	97.9627	-1.76786	n.r.
LV-LP-1.3_29	1089.08	67.3288	1083.08	69.5991	1066.05	54.4636	-2.16013	n.r.
LV-LP-1.3_123	1043.46	53.8492	1051.17	54.4335	1067.3	62.9516	2.23366	n.r.
LV-LP-1.3_10	1063.67	31.7535	1061.03	33.5729	1070.82	52.902	0.66718	n.r.
LV-LP-1.3_61	1106.57	66.5811	1094.67	60.4388	1071.16	64.47	-3.30604	n.r.
LV-LP-1.3_47	1096.53	61.6992	1098.89	65.243	1077.25	97.6595	-1.79017	n.r.
LV-LP-1.3_39	1076.93	63.0358	1083.14	66.1786	1079.49	99.8542	0.237102	n.r.
LV-LP-1.3_105	1025.02	53.1326	1043.51	54.6362	1082.5	64.2494	5.30953	n.r.
LV-LP-1.3_1	1119.41	31.6563	1105.39	32.988	1083.71	49.589	-3.29466	n.r.
LV-LP-1.3_25	1081.87	62.3069	1094.66	65.6075	1084.01	48.6131	0.197196	n.r.
LV-LP-1.3_16	1103.57	31.511	1091.34	32.7363	1090.3	48.9314	-1.21704	n.r.
LV-LP-1.3_89	1056.14	64.8544	1069.01	60.1962	1095.45	64.3827	3.58823	n.r.
LV-LP-1.3_8	1099.42	31.5979	1094.56	32.6822	1096.1	47.9871	-0.303232	n.r.
LV-LP-1.3_23	1114.08	65.8955	1101.88	67.904	1098.02	51.5057	-1.46246	n.r.
LV-LP-1.3_34	1100.48	65.2426	1100.09	67.7639	1103.07	51.2017	0.23434	n.r.
LV-LP-1.3_53	1123.02	65.8479	1116.98	66.966	1105.94	97.1796	-1.54473	n.r.
LV-LP-1.3_48	1112.28	64.6408	1121.18	67.5407	1113.92	100.348	0.147254	n.r.
LV-LP-1.3_20	1164.15	70.2882	1143.57	70.6884	1115.85	52.9782	-4.32876	n.r.
LV-LP-1.3_49	1151.1	65.4158	1155.58	67.2841	1136.14	96.2027	-1.31623	n.r.
LV-LP-1.3_69	1135.26	68.3478	1135.8	61.3848	1136.9	62.3427	0.14397	n.r.
LV-LP-1.3_121b	1018.82	53.2452	1057.59	54.9447	1138.58	62.5526	10.5179	n.r.
LV-LP-1.3_100	1092.74	56.2719	1109.77	56.5488	1143.36	63.8651	4.42695	n.r.
LV-LP-1.3_117	1118.26	57.0261	1126.96	56.1594	1143.82	61.2796	2.23438	n.r.
LV-LP-1.3_65	1152.77	67.9392	1151.22	63.4404	1148.37	71.0218	-0.38237	n.r.
LV-LP-1.3_126	1107.46	56.3748	1121.64	56.0473	1149.27	61.6046	3.63791	n.r.
LV-LP-1.3_81	1165.47	68.8307	1160.4	61.9927	1151	64.0201	-1.25722	n.r.
LV-LP-1.3_121	1100.08	55.9569	1118.94	56.0683	1155.82	62.038	4.82232	n.r.
LV-LP-1.3_33	1154.42	67.2279	1160.86	68.0501	1157.09	47.7805	0.230582	n.r.
LV-LP-1.3_54	1176.81	68.0616	1162.55	67.8772	1157.4	95.1823	-1.67627	n.r.
LV-LP-1.3_64	1138.33	68.2567	1145.41	63.1237	1158.9	68.4841	1.77437	n.r.
LV-LP-1.3_84	1135.64	66.8754	1144.82	61.1158	1162.33	62.8033	2.29651	n.r.
LV-LP-1.3_90	1149.9	58.2277	1154.32	56.7537	1162.71	61.0567	1.10156	n.r.
LV-LP-1.3_115	1188.06	60.312	1179.85	57.7368	1164.9	61.7527	-1.98867	n.r.
LV-LP-1.3_87	1149.08	58.8808	1155.25	57.4951	1166.91	62.6271	1.52796	n.r.
LV-LP-1.3_2	1254.65	35.649	1223.16	35.0552	1168.99	49.1602	-7.32762	n.r.
LV-LP-1.3_6	1166.81	33.9383	1169.28	34.3221	1169.07	48.4709	0.193758	n.r.
LV-LP-1.3_92	1079.51	57.5861	1112.17	58.9737	1176.65	69.1733	8.25551	n.r.
LV-LP-1.3_67	1172.03	70.8689	1173.7	62.8177	1176.84	62.4868	0.408994	n.r.
LV-LP-1.3_88	1173.47	72.4994	1175.89	64.2258	1180.43	65.002	0.589442	n.r.
LV-LP-1.3_66	1160.93	66.3908	1169.6	61.8863	1185.76	66.1415	2.09421	n.r.
LV-LP-1.3_24	1198.26	71.5755	1189.64	70.7537	1191.1	49.7866	-0.601132	n.r.
LV-LP-1.3_28	1221.35	69.2988	1217.12	69.4315	1202.03	48.0714	-1.60801	n.r.
LV-LP-1.3_9	1196.46	33.7206	1205.75	34.1832	1206.33	46.9298	0.817399	n.r.
LV-LP-1.3_114	1159.42	59.7197	1176.28	58.3848	1207.5	62.964	3.98172	n.r.
LV-LP-1.3_96	1220.43	61.7366	1221.41	58.6247	1223.2	60.7764	0.226488	n.r.
LV-LP-1.3_113	1181.41	60.2605	1196.9	58.4109	1225.06	61.716	3.56266	n.r.
LV-LP-1.3_91	1219.29	65.3724	1221.6	60.5375	1225.76	62.0255	0.5278	n.r.
LV-LP-1.3_17	1260.75	35.6957	1259.81	35.3282	1226.72	47.8431	-2.77428	n.r.
LV-LP-1.3_86	1176.54	60.8662	1194.72	58.8378	1227.82	62.1578	4.17601	n.r.
LV-LP-1.3_56	1231.62	69.6847	1244	70.2223	1230.53	96.0588	-0.0883436	n.r.
LV-LP-1.3_60	1221.01	78.4897	1227.55	74.1116	1231.41	98.238	0.844537	n.r.
LV-LP-1.3_31	1236.14	73.2979	1243.4	71.8661	1239.51	48.6177	0.271949	n.r.
LV-LP-1.3_122	1209.88	61.6624	1226.52	59.347	1255.98	62.0443	3.67041	n.r.
LV-LP-1.3_13	1134.12	33.3483	1166.47	34.4809	1257.05	48.2432	9.77919	n.r.
LV-LP-1.3_102	1260.17	63.8678	1262.29	59.8192	1265.96	60.7172	0.457548	n.r.
LV-LP-1.3_58	1150.35	77.1053	1207.16	74.3159	1267.07	95.8383	9.21194	n.r.
LV-LP-1.3_26	1294.75	75.0559	1300.94	73.5938	1268.13	49.7666	-2.09903	n.r.
LV-LP-1.3_72	962.196	67.843	1061.52	64.2454	1271.87	61.7931	24.348	n.r.
LV-LP-1.3_116	1280.81	64.36	1284.36	59.9872	1290.38	59.9336	0.741703	n.r.
LV-LP-1.3_124	1261.43	63.5756	1274.9	59.8473	1297.77	60.0088	2.80034	n.r.
LV-LP-1.3_44	1365.36	76.4376	1344.68	72.3355	1307.75	92.4849	-4.40534	n.r.
LV-LP-1.3_110	1278.73	64.4395	1294.73	60.5271	1321.42	60.4966	3.231	n.r.
LV-LP-1.3_125	1296.43	66.3644	1308.2	61.4301	1327.62	60.9273	2.34915	n.r.
LV-LP-1.3_37	1343.17	77.9783	1354.92	75.644	1331.76	100.433	-0.856782	n.r.
LV-LP-1.3_112	1325.69	67.0379	1333.74	61.5316	1346.76	60.0804	1.56416	n.r.
LV-LP-1.3_36	1371.54	77.9432	1375.55	74.2749	1352.77	94.7956	-1.38815	n.r.
LV-LP-1.3_11	1424.82	40.0276	1402.63	37.0018	1354.31	45.9109	-5.206	n.r.
LV-LP-1.3_14	1388.96	39.2745	1383.3	37.1919	1357.51	47.4088	-2.31705	n.r.
LV-LP-1.3_85	1345.4	67.7034	1350.21	61.805	1357.89	60.0129	0.919645	n.r.
LV-LP-1.3_45	1250.39	71.7974	1298.07	71.4978	1362.49	91.3552	8.22773	n.r.
LV-LP-1.3_27	1392.82	78.8258	1386.64	73.9584	1364.45	46.2604	-2.079	n.r.
LV-LP-1.3_7	1384.82	38.2293	1384.05	36.5382	1366.17	46.1057	-1.36541	n.r.
LV-LP-1.3_38	1368.98	77.0793	1365.12	73.1825	1369.39	92.329	0.0295164	n.r.
LV-LP-1.3_98	1309.41	66.5715	1338.87	62.1761	1386.37	61.1948	5.55075	n.r.
LV-LP-1.3_22	1439.16	83.2826	1418.62	76.1919	1408.06	47.3116	-2.20882	n.r.
LV-LP-1.3_43	1512.77	86.615	1492.37	77.3688	1442.06	92.6275	-4.90288	n.r.
LV-LP-1.3_111	1415.2	70.2121	1426.95	62.9189	1444.59	58.5281	2.03507	n.r.
LV-LP-1.3_94	1836.28	88.7103	1872.27	70.458	1912.52	55.834	3.98657	n.r.
11.QLV-3—Las Vacas Conglomerate (red sandstone clast)—29° 41' 12" S, 68° 39' 50" W
QLV3_13	268.971	11.9957	302.821	12.358	572.5	27.9706	-3.38742	0.00029715
QLV3_36	557.616	31.2679	565.942	25.9728	599.5	30.2143	-0.831517	0.000203818
QLV3_11	599.237	26.8284	600.96	21.9854	607.5	28.3603	-0.171053	0.00120351
QLV3_16	587.755	30.3614	594.962	24.9166	622.5	28.2779	-0.680646	0.000200209
QLV3_15	576.377	25.3331	601.391	21.7268	696.5	30.227	-2.42545	0.000264033
QLV3_31	655.574	34.1443	669.327	27.5406	715.5	29.3809	-1.45917	0.00170143
QLV3_30	471.973	25.9071	523.164	24.0753	753	34.1393	-4.58263	0.000596869
QLV3_8	798.926	34.9423	796.505	26.5682	789.5	28.0422	0.21501	0.000130421
QLV3_17	763.236	33.6429	772.852	26.1659	800.5	27.9786	-0.803741	0.000951059
QLV3_10	670.857	32.2813	713.999	28.1066	852	45.1542	-3.34338	0.000758029
QLV3_39	991.814	44.2952	999.284	31.5647	1015.5	26.6239	2.33242	9.70327e-05
QLV3_3	985.233	43.5387	1001.32	31.2337	1036.5	25.971	4.94612	8.11622e-05
QLV3_29	986.381	51.2072	1007.29	36.6149	1053	28.2819	6.32658	0.000298492
QLV3_12	1044.25	49.749	1058.92	34.876	1089	27.5163	4.1089	0.000132197
QLV3_21	991.443	51.3427	1031.29	37.01	1116.5	27.5993	11.2008	0.000116769
QLV3_20	861.287	41.2983	942.46	32.2096	1137	25.3995	24.2491	0.000106175
QLV3_35	1097.52	47.8386	1117.06	33.0823	1155	25.7389	4.97659	9.61058e-05
QLV3_1	1106.71	50.3511	1125.6	34.6209	1162	26.0884	4.75792	0.00053753
QLV3_19	1195.2	54.9469	1196.39	36.2934	1198.5	25.4565	0.275539	-7.46542e-05
QLV3_23	1289.44	55.6207	1290.37	35.7703	1292	25.0208	0.197843	0.000107566
QLV3_37	1258.5	58.7771	1290.55	38.4725	1344	25.2693	6.3613	0.000173275
QLV3_14	1342.36	58.84	1345.54	37.1799	1350.5	24.7348	0.603045	7.10207e-05
QLV3_2	1222.94	63.9474	1300.8	46.2633	1431.5	52.5418	14.5694	4.02487e-05
QLV3_33	1452.26	66.2109	1471.33	40.5558	1499	24.871	3.11807	0.000292135
QLV3_9	1670.55	68.5474	1710.19	39.9128	1759	25.4899	5.02867	-0.0026679
QLV3_4	1543.04	70.6125	1641.15	42.9134	1769	24.378	12.7731	4.89879e-05
QLV3_18	1577.9	64.4826	1669.71	39.2089	1787	25.8672	11.7012	0.000414755
QLV3_38	2028.64	91.5561	1956.79	46.5843	1881.5	22.9826	-7.8206	0.00134701
QLV3_40	1799.2	79.2273	1839.15	43.9003	1884.5	23.2539	4.52647	0.000174121
QLV3_22	1832.22	80.6716	1886	44.349	1945.5	22.8131	5.82245	6.24407e-05
QLV3_5	1276.56	121.079	1572.31	83.0033	1995.5	24.7005	36.028	0.000143483
QLV3_24	1275.11	57.3555	1577.17	40.9069	2008.5	24.78	36.5143	0.000276854
QLV3_25	2060.02	89.2775	2109.8	46.1566	2158.5	23.4547	4.56252	0.000113769
QLV3_32	2089.62	83.7404	2132.4	43.0374	2174	22.4918	3.88114	0.000150963
QLV3_34	2137.84	85.4922	2163.11	43.2591	2187	22.3515	2.24802	0.000114219
QLV3_26	1795.5	83.577	1989.04	52.7595	2196.5	51.8841	18.2562	0.000264044
QLV3_28	2082.65	88.7266	2181.86	45.8777	2276.5	22.6548	8.51534	9.08711e-05
12.LV-LPL-4—Las Vacas Conglomerate (quartzite clast)—29° 39' 38.1" S, 68° 42' 07.6" W
LV-LPL-4_91	641.605	36.3482	640.83	40.9751	638.178	68.4528	-0.537091	n.r.
LV-LPL-4_62	627.839	25.979	631.448	29.1841	644.378	48.4272	2.56662	n.r.
LV-LPL-4_123	656.447	62.0465	654.348	57.4565	647.2	76.9425	-1.42889	n.r.
LV-LPL-4_52	641.359	40.1972	648.99	41.824	658.331	62.1626	2.57803	n.r.
LV-LPL-4_66	633.584	23.6795	641.513	27.6975	669.521	45.7661	5.3676	n.r.
LV-LPL-4_87b	931.022	51.6895	928.83	52.679	923.71	66.7155	-0.791583	n.r.
LV-LPL-4_112	922.042	80.3559	924.642	68.5392	930.926	69.804	0.954331	n.r.
LV-LPL-4_87	922.647	50.2979	925.152	51.6889	931.207	64.7937	0.919202	n.r.
LV-LPL-4_115	942.652	72.3779	942.291	63.6873	941.524	68.019	-0.119867	n.r.
LV-LPL-4_7	947.33	24.6817	955.709	30.3838	949.464	40.3054	0.224688	n.r.
LV-LPL-4_48	930.629	29.8944	938.438	27.3008	966.756	31.8914	3.73692	n.r.
LV-LPL-4_42	941.364	21.7042	957.77	25.7415	969.795	30.4661	2.93169	n.r.
LV-LPL-4_24	944.652	22.3573	953.428	30.442	971.792	39.4877	2.79273	n.r.
LV-LPL-4_23	933.991	26.075	940.713	39.6885	973.681	52.3881	4.07629	n.r.
LV-LPL-4_70	917.169	36.3594	936.041	37.0516	980.72	44.0882	6.47994	n.r.
LV-LPL-4_41	944.081	31.6746	954.035	40.5059	989.107	48.1578	4.55213	n.r.
LV-LPL-4_50	1013.59	22.9554	1020.13	21.1143	1005.28	25.3887	-0.827113	n.r.
LV-LPL-4_107	1002.79	67.5873	1006.6	60.9246	1015	64.5309	1.20292	n.r.
LV-LPL-4_1	975.571	31.3395	988.259	21.6386	1015.9	175.984	3.96938	n.r.
LV-LPL-4_61	1012.52	36.9407	1015.72	38.3034	1022.61	46.651	0.986826	n.r.
LV-LPL-4_25	1010.89	19.2616	1018.23	20.6611	1034.06	25.5751	2.24091	n.r.
LV-LPL-4_51	1032.37	32.9065	1044.2	45.4447	1034.65	54.6972	0.220728	n.r.
LV-LPL-4_88	1047.25	59.4115	1044.68	57.5849	1039.38	66.9732	-0.75721	n.r.
LV-LPL-4_128	1047.13	81.5804	1045.09	68.3808	1040.92	65.9479	-0.595778	n.r.
LV-LPL-4_71	1007.74	36.3385	1018.77	37.745	1042.55	44.9822	3.3383	n.r.
LV-LPL-4_89	1039.18	56.3987	1041.39	55.2742	1046.1	62.658	0.661409	n.r.
LV-LPL-4_96	1016.44	54.682	1025.92	54.5639	1046.29	62.7666	2.85271	n.r.
LV-LPL-4_36	1061.09	20.1506	1054.98	17.0753	1046.52	20.7117	-1.39268	n.r.
LV-LPL-4_75	1087.36	56.6909	1075.95	55.3172	1051	39.3932	-3.45903	n.r.
LV-LPL-4_29	1040.66	29.4177	1042.92	25.3568	1053	24.6685	1.17183	n.r.
LV-LPL-4_40	1050.72	39.7415	1053.35	50.291	1053.37	59.6349	0.251644	n.r.
LV-LPL-4_31	1052.84	22.4868	1054.03	20.2938	1053.9	23.6902	0.100894	n.r.
LV-LPL-4_2	1051.92	25.9193	1058.45	27.1156	1054.67	30.3306	0.260211	n.r.
LV-LPL-4_14	1050.97	25.5874	1055.89	36.6636	1059.93	44.6762	0.845646	n.r.
LV-LPL-4_45	1074.05	29.5581	1066.66	30.8038	1062.41	36.9357	-1.09608	n.r.
LV-LPL-4_12	1175.88	39.6999	1149.26	26.8609	1066.78	22.2539	-10.2272	n.r.
LV-LPL-4_125	1159.09	98.9089	1129.47	76.5401	1073.04	67.6051	-8.01901	n.r.
LV-LPL-4_26	1027.08	39.2637	1043.26	65.0752	1075.73	81.5771	4.52245	n.r.
LV-LPL-4_84	1067.92	58.3549	1071.11	56.7891	1077.69	64.0009	0.907373	n.r.
LV-LPL-4_9	545.542	30.7917	670.646	30.1072	1081.03	38.5731	49.5349	n.r.
LV-LPL-4_28	1040.79	27.9181	1050.47	35.6955	1082.41	40.8498	3.84508	n.r.
LV-LPL-4_127	1095.6	100.38	1093.59	79.6579	1089.68	72.4998	-0.543198	n.r.
LV-LPL-4_30	1100.25	25.6148	1096.42	29.5976	1091.02	35.4524	-0.845497	n.r.
LV-LPL-4_64	1077.32	39.1702	1083.14	37.9267	1094.84	39.5988	1.59997	n.r.
LV-LPL-4_108	1111.46	79.9267	1105.88	67.2664	1095	64.8807	-1.50323	n.r.
LV-LPL-4_130	1083.36	59.3842	1087.58	57.2382	1096.12	63.2243	1.1641	n.r.
LV-LPL-4_17	1005.7	33.5807	1003.88	56.064	1101.05	64.6031	8.65917	n.r.
LV-LPL-4_103	1041.64	58.2221	1061.13	56.5728	1101.52	61.7997	5.43673	n.r.
LV-LPL-4_44	1104.45	31.3713	1099.17	30.6324	1108.13	32.86	0.331944	n.r.
LV-LPL-4_18	1109.92	28.4895	1111.07	28.9491	1114.4	34.7862	0.402567	n.r.
LV-LPL-4_106	1116.14	66.8604	1116.72	61.3431	1117.92	65.508	0.15946	n.r.
LV-LPL-4_114	1062.17	77.1926	1082.34	68.0078	1123.26	70.3078	5.43915	n.r.
LV-LPL-4_129	1156.91	67.2816	1145.84	60.8236	1125.03	63.1975	-2.83435	n.r.
LV-LPL-4_54	1069.81	37.4143	1088.51	37.4446	1126.1	39.8078	4.99812	n.r.
LV-LPL-4_55	1069.81	37.4143	1088.51	37.4446	1126.1	39.8078	4.99812	n.r.
LV-LPL-4_93	1109.3	58.9782	1115.33	57.6004	1127.17	64.2353	1.5849	n.r.
LV-LPL-4_111	1104.03	86.3727	1112.06	72.1232	1127.85	69.6513	2.11187	n.r.
LV-LPL-4_58	1112.8	40.1464	1119.95	38.4142	1133.84	38.9179	1.85538	n.r.
LV-LPL-4_117	1077.69	60.5983	1096.77	58.6234	1134.89	64.6061	5.03964	n.r.
LV-LPL-4_27	1040.86	25.064	1048.67	33.2547	1136.04	38.0513	8.37787	n.r.
LV-LPL-4_86	1141.38	62.4324	1139.63	58.8121	1136.38	63.0054	-0.440338	n.r.
LV-LPL-4_39	1149.16	29.6845	1151.95	33.375	1138.05	39.8854	-0.975539	n.r.
LV-LPL-4_33	1130.78	37.9901	1138.41	37.0108	1142.62	38.7174	1.03618	n.r.
LV-LPL-4_53	1113.17	41.5791	1123.76	40.9666	1144.26	45.3997	2.71642	n.r.
LV-LPL-4_116	1016.74	55.9832	1058.38	56.9972	1145.34	65.3432	11.2282	n.r.
LV-LPL-4_73	1181.89	62.2708	1169.87	58.5313	1145.82	40.0021	-3.14819	n.r.
LV-LPL-4_43	1144.28	28.4787	1145.14	29.7883	1148.67	32.4465	0.3824	n.r.
LV-LPL-4_85	1093.36	57.8022	1112.49	56.9767	1150.13	62.5895	4.93625	n.r.
LV-LPL-4_38	1133.56	27.4719	1140.55	34.8758	1150.92	39.2534	1.5091	n.r.
LV-LPL-4_15	1101.62	45.4722	1120.33	37.3855	1150.97	83.6004	4.2877	n.r.
LV-LPL-4_8	1103.33	25.2651	1117.56	28.0727	1153.06	32.3986	4.3125	n.r.
LV-LPL-4_95	1167.8	72.7116	1163.7	63.5628	1156.15	62.9296	-1.00754	n.r.
LV-LPL-4_99	1076.05	58.4817	1103.08	57.5466	1156.84	63.096	6.98356	n.r.
LV-LPL-4_97	1123.03	62.3641	1135.72	58.9259	1160.13	62.1451	3.19815	n.r.
LV-LPL-4_104	1074.32	57.736	1104.09	57.4574	1163.3	63.7558	7.64896	n.r.
LV-LPL-4_5	1172.28	29.0473	1181.72	29.7032	1167.27	32.5119	-0.429747	n.r.
LV-LPL-4_100	1122.73	59.5804	1138.61	57.5673	1169.09	61.298	3.96602	n.r.
LV-LPL-4_94	1090.02	61.1243	1116.75	59.1299	1169.24	64.1941	6.77576	n.r.
LV-LPL-4_126	1185.05	88.4045	1180.57	71.9377	1172.44	66.2896	-1.07527	n.r.
LV-LPL-4_121	1097.04	79.9993	1123.12	68.8948	1173.99	66.5621	6.55409	n.r.
LV-LPL-4_77	1194.36	62.5321	1188.4	58.8887	1175.69	39.9432	-1.58824	n.r.
LV-LPL-4_124	1161.38	62.2178	1170	58.8701	1186.06	61.6523	2.08115	n.r.
LV-LPL-4_82	1198.29	64.0525	1194.39	59.8582	1187.4	62.9176	-0.917463	n.r.
LV-LPL-4_37	1183.83	22.9188	1192.8	17.3531	1190.44	19.2644	0.555594	n.r.
LV-LPL-4_6	1180.52	33.6531	1192.86	45.1811	1192.86	53.7817	1.03473	n.r.
LV-LPL-4_21	1192.77	31.9835	1201.52	37.307	1204.84	40.1426	1.00137	n.r.
LV-LPL-4_10	1197.14	56.873	1197.8	83.6898	1211.58	91.2492	1.19227	n.r.
LV-LPL-4_81	1180.15	62.9378	1194.98	59.5259	1211.9	42.1128	2.61968	n.r.
LV-LPL-4_63	1133.4	42.3341	1160.95	40.7468	1212.72	41.6644	6.54075	n.r.
LV-LPL-4_119	1109.28	76.2646	1145.07	66.7766	1213.58	63.89	8.59478	n.r.
LV-LPL-4_79	1229.1	65.2868	1223.54	60.6596	1220.03	39.6754	-0.742631	n.r.
LV-LPL-4_68	1094.74	38.2045	1140.07	38.808	1227.38	40.6644	10.8067	n.r.
LV-LPL-4_3	1196.99	40.1736	1212.28	33.8142	1229.61	30.2784	2.65288	n.r.
LV-LPL-4_22	1160.32	32.4144	1189.13	33.7413	1232.94	32.8151	5.89004	n.r.
LV-LPL-4_13	1231.77	22.2932	1231.81	24.5559	1239.52	24.7753	0.625631	n.r.
LV-LPL-4_105	1136.1	65.7127	1177.63	61.555	1254.84	62.2805	9.4626	n.r.
LV-LPL-4_110	1242.96	89.8302	1250.19	72.9019	1262.72	65.5921	1.56476	n.r.
LV-LPL-4_120	1200.24	81.4982	1225.32	69.5342	1269.81	65.7529	5.47868	n.r.
LV-LPL-4_47	1201.58	40.8676	1218.95	28.8749	1280.68	24.9994	6.17618	n.r.
LV-LPL-4_32	1256.5	34.3622	1268.99	26.1018	1283.13	26.505	2.07572	n.r.
LV-LPL-4_35	1209.55	35.0813	1236.59	117.774	1284.76	119.838	5.85367	n.r.
LV-LPL-4_46	1287.39	38.7969	1297.22	44.2529	1290.43	45.7816	0.2355	n.r.
LV-LPL-4_65	1228.1	43.6378	1252.72	40.7651	1295.27	38.567	5.18554	n.r.
LV-LPL-4_72	1422.56	88.9374	1373.29	75.344	1295.63	65.7405	-9.79693	n.r.
LV-LPL-4_109	1266.77	117.886	1278.9	87.9701	1299.4	69.7416	2.5108	n.r.
LV-LPL-4_74	1281.82	68.6569	1294.34	62.2075	1313.32	38.5511	2.39877	n.r.
LV-LPL-4_19	1201.64	39.0042	1250.24	30.2061	1315.76	24.0411	8.67303	n.r.
LV-LPL-4_80	1260.34	69.9056	1283.13	63.833	1319.67	37.6687	4.49588	n.r.
LV-LPL-4_98	1347.19	70.0871	1337.3	62.3408	1321.56	63.7009	-1.93936	n.r.
LV-LPL-4_69	1229.03	42.5086	1263.33	40.8354	1322.21	39.7509	7.04718	n.r.
LV-LPL-4_102	1203.68	63.6636	1249.52	60.8102	1329.48	61.1061	9.46249	n.r.
LV-LPL-4_76	1359.03	69.6575	1351.74	62.7442	1338.4	40.2316	-1.54125	n.r.
LV-LPL-4_101	1288.23	68.9385	1313.35	62.9581	1354.66	61.3058	4.90396	n.r.
LV-LPL-4_34	1350.53	37.2637	1361.2	36.9393	1362.05	34.7914	0.845448	n.r.
LV-LPL-4_83	1327.83	71.5033	1342.38	64.2109	1365.71	62.3174	2.77321	n.r.
LV-LPL-4_113	1330.9	102.03	1347.88	79.2291	1374.99	66.7211	3.20644	n.r.
LV-LPL-4_56	1361.09	49.9233	1378.75	43.8475	1406.2	38.8938	3.20794	n.r.
LV-LPL-4_122	1467.09	100.457	1448.65	76.3535	1421.77	63.6929	-3.18726	n.r.
LV-LPL-4_4	1424.07	38.3435	1426.93	46.3707	1435.22	44.1107	0.776773	n.r.
LV-LPL-4_49	1397.38	48.1089	1411.91	56.2131	1436.58	53.7618	2.72834	n.r.
LV-LPL-4_57	1382.17	49.152	1407.14	44.8221	1445.15	42.2356	4.3582	n.r.
LV-LPL-4_11	1053.79	73.7346	1178.37	41.1776	1451.82	165.609	27.4157	n.r.
LV-LPL-4_59	1440.36	47.9783	1451.28	42.7577	1467.3	37.6828	1.83567	n.r.
LV-LPL-4_67	1230.92	45.5721	1340.93	44.3792	1521.09	41.7548	19.0761	n.r.
LV-LPL-4_90	1845.41	101.385	1793.1	73.9033	1732.85	57.4987	-6.49544	n.r.
LV-LPL-4_118	2574.62	137.851	2647.67	83.4773	2704.04	51.3904	4.78643	n.r.
LV-LPL-4_16	163.43	184.823	1035.93	14.6936	4629.27	389.612	96.4696	n.r.
13.LV-LPL-1.1—Las Vacas Conglomerate (gneiss clast)—29° 39' 29.2" S, 68° 42' 08.2" W
LV-LPL-1.1_53	503.162	18.1879	510.536	15.1339	543.5	9.58254	7.42186	0.000278135
LV-LPL-1.1_2	521.17	14.6122	528.178	12.2971	558.5	14.4942	6.68396	0.000580319
LV-LPL-1.1_55	481.362	14.3031	495.306	12.1719	560	9.2768	14.0425	0.000293846
LV-LPL-1.1_24	471.753	12.5901	487.201	10.862	560.5	10.9745	15.8336	0.00126873
LV-LPL-1.1_50	474.064	14.2333	490.68	12.3076	569	12.9806	16.6847	0.000868878
LV-LPL-1.1_15	491.358	14.3999	506.376	12.2696	574.5	10.9025	14.4721	0.000322316
LV-LPL-1.1_11	563.647	19.5607	568.004	15.8131	585.5	8.67282	3.73239	0.00011152
LV-LPL-1.1_31	502.91	15.3921	518.141	13.018	585.5	10.2076	14.1059	0.000569158
LV-LPL-1.1_26	533.15	14.8192	549.854	12.7819	619.5	18.3463	13.9387	0.00136587
LV-LPL-1.1_33	535.86	17.4895	553.329	14.6377	625.5	11.2828	14.3309	0.000530158
LV-LPL-1.1_9	596.458	24.586	603.785	19.7253	631	11.9053	5.47425	0.000360616
LV-LPL-1.1_1	626.153	20.0234	627.524	15.7873	632.5	9.28764	1.00348	0.000134136
LV-LPL-1.1_49	540.878	17.5298	559.346	15.0457	635	20.3826	14.8223	0.00115497
LV-LPL-1.1_34	549.554	14.1867	566.835	12.2291	636.5	18.1678	13.66	0.000830227
LV-LPL-1.1_59	553.898	19.4928	572.953	16.2275	649	12.4562	14.6537	0.000360838
LV-LPL-1.1_47	584.882	14.8987	599.728	12.3187	656	12.4115	10.8412	0.000584679
LV-LPL-1.1_41	575.516	16.0856	592.975	13.2176	660	8.853	12.8006	0.000239308
LV-LPL-1.1_22	524.909	13.9105	552.144	12.5221	666	22.194	21.1848	0.000379537
LV-LPL-1.1_37	577.011	13.9825	599.714	12.0398	686.5	17.6527	15.9488	0.00166391
LV-LPL-1.1_56	385.969	27.1528	443.239	27.8044	752.5	60.0737	48.7084	0.000623449
LV-LPL-1.1_27	671.694	19.5259	695.587	15.6727	773.5	12.9209	13.1617	0.000889094
LV-LPL-1.1_44	658.305	15.6887	685.066	13.7749	774	24.9155	14.9476	0.00300372
LV-LPL-1.1_51	625.287	22.7998	680.151	19.581	866	21.6254	27.796	0.000619713
LV-LPL-1.1_8	513.127	20.202	588.252	39.7066	889.5	165.033	42.3129	0.00132007
LV-LPL-1.1_58	667.774	14.442	721.932	12.4685	894	16.8986	25.305	0.000652695
LV-LPL-1.1_32	890.505	23.1598	923.06	17.0172	1001.5	8.53436	11.0829	0.00028321
LV-LPL-1.1_23	1010.05	26.5439	1051.94	18.715	1140	7.95933	11.399	0.000371787
LV-LPL-1.1_42	851.431	16.7233	948.689	18.3083	1181.5	41.915	27.9365	0.000206425
LV-LPL-1.1_29	1217.99	38.3909	1261.38	25.0853	1336	8.9253	8.83297	0.000269304
LV-LPL-1.1_52	1036.77	64.3264	1138.87	52.3847	1339	74.1305	22.5714	0.000329004
LV-LPL-1.1_6	1533.73	37.2899	1628.58	22.8925	1753	13.803	12.5084	0.000440414
LV-LPL-1.1_5	1731.76	45.5161	1744.68	25.0334	1760	6.4263	1.60457	0.00010936
LV-LPL-1.1_4	1715.23	59.2547	1736.76	32.7846	1762.5	8.85598	2.68201	0.000502778
LV-LPL-1.1_45	1593.82	44.8544	1670.9	26.1212	1769	7.43753	9.90254	0.000454758
LV-LPL-1.1_18	1583.67	36.3695	1665.71	21.5324	1770.5	9.42253	10.5525	0.000284696
LV-LPL-1.1_13	1611.43	40.5923	1684.54	23.9789	1776.5	12.6036	9.29184	0.00140751
LV-LPL-1.1_7	1722.73	53.7062	1749.47	29.6336	1781.5	6.68329	3.29872	0.000131349
LV-LPL-1.1_25	1551.72	40.2119	1653.88	24.1594	1786	10.5874	13.1176	0.00116093
LV-LPL-1.1_28	1815.19	44.5972	1907.04	24.366	2008.5	6.80425	9.62461	0.000311202
LV-LPL-1.1_10	1982.69	56.4981	2041.26	29.139	2101	6.40887	5.63122	0.000184363
LV-LPL-1.1_38	1874.38	51.8556	1984.88	27.8554	2102	6.77802	10.8287	0.00024806
LV-LPL-1.1_60	1971.03	50.8186	2036.78	26.3519	2104	6.06759	6.31979	0.000157869
LV-LPL-1.1_43	1962.58	55.7273	2034.42	28.9849	2108	6.76369	6.89831	0.000151815
LV-LPL-1.1_20	1932.49	54.927	2020.58	28.8156	2111.5	5.3621	8.47809	0.000122493
LV-LPL-1.1_19	2009.35	94.2239	2074.31	48.5536	2139.5	16.6479	6.0833	0.000595015
LV-LPL-1.1_3	2168.39	82.0089	2157.95	39.8228	2148	9.02658	-0.949368	0.000107961
LV-LPL-1.1_12	2017.76	58.7444	2092.12	30.0563	2166	6.28037	6.84411	0.00015414
LV-LPL-1.1_16	1905.73	49.8486	2036.94	26.7163	2172.5	7.80173	12.2793	0.000138755
LV-LPL-1.1_30	1929.12	45.3015	2059.82	34.7205	2193	50.2528	12.0327	0.000942863
LV-LPL-1.1_48	1851.88	53.9895	2018.43	29.3984	2193.5	6.07064	15.5742	0.000170277
LV-LPL-1.1_14	2309.12	57.4201	2407.1	27.3135	2491	6.10729	7.30144	0.000173147
LV-LPL-1.1_54	2223.79	80.9985	2368.48	39.7097	2495.5	11.4786	10.8882	0.00102134
LV-LPL-1.1_46	2039.29	51.7875	2330.15	28.3036	2595.5	16.1086	21.4298	0.00035971
LV-LPL-1.1_21	2685.69	58.899	2783.16	25.5839	2854.5	5.7073	5.91372	0.000144483
LV-LPL-1.1_57	2422.1	65.562	2820.12	31.5912	3118.5	12.1362	22.3313	9.13142e-05
LV-LPL-1.1_35	3366.02	77.0968	3557.04	29.0297	3666.5	5.24138	8.19522	9.35559e-05
LV-LPL-1.1_17	3125.24	506.399	4208.33	201.804	4600	64.6729	32.0601	0.0632747
LV-LPL-1.1_36	6231.79	1560.58	5327.37	381.735	4600	37.1315	-35.4736	0.0730951
LV-LPL-1.1_39	4074.67	550.697	4645.47	179.302	4600	17.1839	11.4202	0.0658293
LV-LPL-1.1_40	2131.3	201.419	3729.09	108.561	4600	21.8428	53.6675	0.0623142
16.LL-LL-1—La Laja Formation—31° 39' 38.9" S, 68° 44' 10.2" W
LL-LL-1_19	615.476	27.9286	626.047	22.5105	664.5	18.8854	-0.852694	0.00115711
LL-LL-1_20	1135.31	50.2416	1094.35	32.9378	1013.5	22.1097	-12.0184	0.00379036
LL-LL-1_11	1193.68	55.6262	1133.26	35.4043	1019	22.0532	-17.1427	0.00527001
LL-LL-1_15	1050.39	45.4998	1061.8	31.0739	1085	14.0993	3.18973	0.000785484
LL-LL-1_3	1030.62	46.2095	1063.2	32.1502	1130.5	14.8353	8.83515	0.00192367
LL-LL-1_14	1069.43	48.2418	1095.01	32.9342	1146	14.0437	6.68161	0.00120099
LL-LL-1_17	1185.43	53.0468	1182.27	35.6476	1176.5	30.6872	-0.759	0.00428082
LL-LL-1_10	1042.65	39.5879	1090.43	27.9206	1187	16.8139	12.1607	0.00136164
LL-LL-1_5	1155.85	54.282	1188.6	36.2034	1248.5	17.1572	7.42101	0.00338707
LL-LL-1_4	1185.62	45.8937	1222.38	30.5436	1287.5	16.5746	7.91313	0.00123502
LL-LL-1_21	1193.73	49.3746	1239.68	33	1320.5	19.2575	9.60013	0.00474219
LL-LL-1_2	1259.72	53.4997	1292.44	34.339	1347	13.5048	6.47976	0.000904184
LL-LL-1_16	1232.15	50.7831	1279.9	33.2519	1361	15.5518	9.467	0.000829504
LL-LL-1_7	1273.36	60.2051	1309.19	38.606	1368	17.0949	6.9183	0.00221553
LL-LL-1_12	1262.07	53.0183	1303.59	34.2493	1372.5	15.4963	8.04621	0.00190337
LL-LL-1_8	1332	57.2183	1350.56	35.6866	1380	13.9502	3.4784	0.00109598
LL-LL-1_6	1241.82	53.1088	1295.45	34.8603	1385.5	18.0103	10.37	0.00299927
LL-LL-1_1	1300.59	56.0118	1335.8	35.5171	1392.5	14.1267	6.60053	0.000907803
LL-LL-1_13	1369.18	60.2033	1397.03	37.1733	1439.5	13.57	4.88508	0.00061617
LL-LL-1_18	1169.89	45.9173	1270.55	35.9505	1445	48.7365	19.0391	0.00186362
LL-LL-1_9	2430.09	230.918	3454.91	123.435	4118	88.4811	40.9887	0.0352638
17.03-346— La Laja Formation— 31° 29' 35.29" S, 68° 39' 50.48" W
03346_78	529.859	26.7217	540.349	32.5614	585.042	82.307	9.43224	n.r.
03346_102	1081.28	52.5357	1080.2	47.224	1078.18	56.4821	-0.287277	n.r.
03346_91	1244.11	57.1458	1245.62	49.5401	1248.39	54.2241	0.343082	n.r.
03346_118	1277.18	61.9757	1270.74	52.5673	1260.02	58.3571	-1.36143	n.r.
03346_58	1309.56	57.3055	1292.41	49.2577	1264.2	53.8254	-3.58816	n.r.
03346_42	1246.98	45.0583	1254.71	32.6627	1268.04	26.9616	1.66103	n.r.
03346_59	1659.98	71.0026	1497.36	53.0892	1274.34	54.8478	-30.262	n.r.
03346_41	1268.65	45.2255	1274.74	32.4398	1285.08	25.8521	1.27862	n.r.
03346_88	1223.85	58.6717	1248.34	52.3275	1291	61.0105	5.20115	n.r.
03346_23	1276.9	45.4817	1286.65	32.5857	1303.01	25.7946	2.00405	n.r.
03346_104	1234.73	58.3405	1259.83	51.9882	1303.1	60.0288	5.24648	n.r.
03346_80	1355.12	59.8278	1335.88	50.4627	1305.36	53.9083	-3.81157	n.r.
03346_67	1359.94	61.4545	1339.9	50.9936	1308.2	53.1423	-3.95562	n.r.
03346_5	1231.94	60.9956	1260.04	46.7049	1308.39	39.9305	5.84331	n.r.
03346_86	1254.43	55.8943	1275.84	50.1196	1312.26	57.0047	4.40688	n.r.
03346_74	1304.94	58.8281	1307.67	50.8734	1312.31	55.9261	0.561501	n.r.
03346_85	1370.28	58.9862	1350.53	49.8143	1319.55	52.5779	-3.84383	n.r.
03346_119	1307.17	68.1012	1312.78	55.3737	1322.11	56.6179	1.13037	n.r.
03346_66	1366.01	59.7222	1349.11	50.5328	1322.58	54.0611	-3.2837	n.r.
03346_62	1321.47	58.4578	1321.94	50.1538	1322.87	53.6006	0.106086	n.r.
03346_79	1404.45	60.9309	1373.25	50.6697	1325.2	53.3642	-5.9803	n.r.
03346_105	1333.1	63.4678	1330.02	52.8694	1325.23	55.8893	-0.593544	n.r.
03346_98	1374.37	63.9191	1355.37	52.3943	1325.68	54.284	-3.67302	n.r.
03346_89	1336.9	61.1534	1333.05	51.7943	1327.04	55.7774	-0.742518	n.r.
03346_8	747.665	58.9903	909.867	53.8119	1327.3	34.1773	43.6701	n.r.
03346_81	1357.96	60.4429	1346.28	50.6881	1327.93	52.9579	-2.26171	n.r.
03346_90	1296.91	58.2165	1308.85	50.1795	1328.64	53.2652	2.38814	n.r.
03346_101	1410.29	67.8789	1378.08	53.8153	1328.68	53.9288	-6.14217	n.r.
03346_60	1392.4	60.1728	1367.69	50.2701	1329.45	52.5716	-4.73492	n.r.
03346_116	1310.47	62.8037	1317.64	52.44	1329.49	54.3874	1.43014	n.r.
03346_50	1681.62	19.2427	1531.43	11.1217	1329.73	10.5252	-26.4631	n.r.
03346_107	1321.19	61.8184	1324.77	52.1093	1330.73	55.2283	0.716378	n.r.
03346_111	1344.51	63.4255	1339.9	52.5669	1332.71	54.7428	-0.884849	n.r.
03346_30	1335.74	47.2673	1334.87	32.8201	1333.52	23.984	-0.166884	n.r.
03346_82	1385.17	60.5242	1364.93	50.4974	1333.54	52.5511	-3.87133	n.r.
03346_84	1346.35	58.0622	1341.62	49.9228	1334.24	53.5971	-0.908185	n.r.
03346_28	1334.06	46.3351	1334.41	32.2152	1335.03	23.2454	0.0723801	n.r.
03346_100	1348.7	63.4186	1343.51	52.456	1335.42	54.3068	-0.994484	n.r.
03346_113	1346.4	67.3927	1342.33	54.0604	1336.01	53.2185	-0.77763	n.r.
03346_64	1376.37	59.7845	1360.65	50.2899	1336.21	52.6963	-3.0051	n.r.
03346_4	1311.66	64.0532	1321.2	46.9697	1336.76	36.9661	1.87763	n.r.
03346_112	1304.03	64.2905	1316.72	53.2863	1337.6	54.5123	2.5094	n.r.
03346_109	1321.16	64.0566	1327.57	52.9696	1338.08	54.2104	1.26423	n.r.
03346_95	1362.57	65.0183	1353.45	52.8749	1339.23	53.2981	-1.74265	n.r.
03346_75	1388.14	60.4569	1369.02	50.4764	1339.46	52.4555	-3.63454	n.r.
03346_77	1367.66	60.3607	1357.1	50.6153	1340.66	52.6106	-2.01396	n.r.
03346_53	1672.03	15.6735	1530.8	9.6324	1340.75	11.536	-24.708	n.r.
03346_110	1368.72	66.1079	1358.18	53.5208	1341.79	54.1008	-2.0074	n.r.
03346_68	1393.61	60.8566	1374.04	50.671	1343.92	52.5407	-3.69797	n.r.
03346_96	1368.89	61.8848	1359.14	51.9793	1344	55.4835	-1.85212	n.r.
03346_93	1348.99	61.094	1347.01	51.4886	1344.03	54.302	-0.369348	n.r.
03346_120	1364.6	67.7992	1356.72	54.7185	1344.49	55.7328	-1.49615	n.r.
03346_14	1299.31	63.5036	1316.69	46.3956	1345.16	34.3594	3.4085	n.r.
03346_114	1354.73	67.7295	1351.7	54.5518	1347.05	54.6392	-0.570177	n.r.
03346_61	1361.41	59.0799	1355.93	50.3398	1347.45	53.4018	-1.0363	n.r.
03346_33	1329.9	47.5139	1336.89	33.2632	1348.16	24.9951	1.35466	n.r.
03346_117	1331.28	72.5202	1337.73	59.0357	1348.22	63.4718	1.25692	n.r.
03346_83	1352.44	59.3705	1350.9	50.8061	1348.63	54.5496	-0.28228	n.r.
03346_25	1366.41	47.9938	1359.61	33.8689	1348.99	28.6505	-1.29138	n.r.
03346_76	1345.11	59.6797	1346.96	50.7277	1350.06	53.3906	0.36647	n.r.
03346_70	1376.23	59.5412	1365.96	50.7803	1350.1	54.6937	-1.93487	n.r.
03346_10	1300.02	63.8168	1319.16	47.058	1350.43	36.7778	3.73345	n.r.
03346_103	1369.85	64.8675	1362.23	53.1743	1350.47	54.7348	-1.43466	n.r.
03346_17	1341.95	48.7056	1345.73	34.7688	1351.8	30.045	0.728792	n.r.
03346_55	1629.88	15.1963	1512.8	10.2801	1352.54	14.9348	-20.5051	n.r.
03346_9	1338.57	66.4583	1344.07	48.393	1352.87	38.833	1.05712	n.r.
03346_52	1634.62	18.0589	1515.77	10.9683	1353.49	11.9507	-20.7709	n.r.
03346_2	1353.43	65.5377	1353.47	46.8663	1353.58	34.4966	0.011516	n.r.
03346_108	1345.41	64.4038	1349.53	53.5081	1356.23	56.0192	0.797549	n.r.
03346_36	1325.02	47.4264	1337.17	33.7212	1356.72	27.2256	2.33694	n.r.
03346_48	1717.81	14.9609	1562.41	8.95833	1358.29	10.2222	-26.4691	n.r.
03346_16	1359.7	48.5185	1359.25	33.8823	1358.59	26.743	-0.081681	n.r.
03346_3	1333	64.7992	1342.87	46.8309	1358.69	34.7845	1.89066	n.r.
03346_19	1351.03	47.2424	1354.09	33.198	1358.99	26.2431	0.585962	n.r.
03346_40	1334.04	46.4788	1344.11	32.8603	1360.24	25.7134	1.92644	n.r.
03346_7	1326.65	64.9184	1339.89	47.0238	1361.15	34.9395	2.53474	n.r.
03346_1	1328.76	64.6749	1341.39	46.9229	1361.64	35.2092	2.41474	n.r.
03346_26	1354.39	46.2676	1357.21	32.5231	1361.7	25.4929	0.537008	n.r.
03346_20	1361.08	47.7961	1361.41	33.7919	1361.98	28.1923	0.0655774	n.r.
03346_18	1418.13	50.1349	1395.98	33.595	1362.36	23.5318	-4.09356	n.r.
03346_15	1274.78	63.9423	1308.34	48.3436	1363.83	40.6455	6.52883	n.r.
03346_38	1321.86	46.5809	1339.39	33.2238	1367.56	26.5306	3.34133	n.r.
03346_92	1347.68	62.1955	1356.55	52.4442	1370.72	55.2394	1.68078	n.r.
03346_51	1636.55	18.6117	1524.25	11.9487	1371.64	15.4237	-19.3135	n.r.
03346_49	1630.03	19.6476	1521.43	13.1991	1373.45	18.759	-18.6815	n.r.
03346_35	1316.92	48.1835	1339.24	35.5837	1375.15	33.3831	4.23425	n.r.
03346_29	1346.32	48.7786	1357.97	34.2366	1376.42	26.6871	2.18716	n.r.
03346_46	1541.05	14.3783	1474.76	9.32162	1380.6	11.2075	-11.6222	n.r.
03346_24	1346.9	47.4422	1360.32	33.1892	1381.51	24.7805	2.50545	n.r.
03346_57	1374.9	60.7022	1379.83	51.4381	1387.63	53.9682	0.917862	n.r.
03346_45	1349.85	47.7126	1364.54	33.3666	1387.67	24.946	2.72523	n.r.
03346_34	1413.08	50.0488	1405.87	33.9794	1395.01	24.7517	-1.29551	n.r.
03346_47	1635.89	20.2223	1533.77	14.739	1395.65	23.6551	-17.2131	n.r.
03346_115	1382.72	65.2009	1388.02	53.2113	1396.35	52.9528	0.975921	n.r.
03346_12	1308.24	67.0504	1343.8	49.8784	1400.93	40.7412	6.61606	n.r.
03346_87	1345.96	61.3679	1370.4	52.5805	1408.87	55.8805	4.46571	n.r.
03346_69	1393.86	61.8097	1400.83	51.8438	1411.63	53.3362	1.25893	n.r.
03346_11	961.775	49.9629	1109.91	43.4775	1412.94	33.2343	31.9312	n.r.
03346_63	1334.97	59.9528	1366.26	51.3961	1415.7	53.0102	5.70242	n.r.
03346_73	1455.34	63.4295	1440.15	51.7559	1417.95	51.6413	-2.63698	n.r.
03346_6	1433.32	69.3188	1427.45	48.0737	1418.75	33.526	-1.02711	n.r.
03346_27	1423.72	73.9629	1422.24	54.7826	1420.06	61.1975	-0.257604	n.r.
03346_72	1453.06	63.7788	1439.95	52.072	1420.79	52.1728	-2.27165	n.r.
03346_106	1448.77	67.3535	1440.83	53.7941	1429.28	52.4774	-1.36326	n.r.
03346_99	1429.7	66.0054	1434.2	53.6334	1441.05	53.2222	0.787996	n.r.
03346_44	1409.46	57.4931	1423.18	39.6092	1443.83	32.0524	2.3805	n.r.
03346_43	1397.43	49.6895	1416.36	34.3654	1444.99	25.6394	3.29085	n.r.
03346_94	1131.92	54.1551	1245.73	50.7088	1448.44	54.0728	21.8526	n.r.
03346_13	1421.52	68.242	1436.79	48.0463	1459.53	33.9738	2.60403	n.r.
03346_21	1408.09	52.2715	1429.69	35.5598	1462.05	24.8262	3.69027	n.r.
03346_97	1498.99	69.0777	1486.98	54.8438	1470.06	54.016	-1.96763	n.r.
03346_39	1435.37	50.1332	1450.73	34.7474	1473.35	27.5272	2.57764	n.r.
03346_65	1320.72	57.6144	1384.17	51.0259	1483.56	53.0121	10.976	n.r.
03346_31	1458.05	53.7109	1478.27	36.3589	1507.47	26.6365	3.27838	n.r.
03346_32	1334.39	49.6681	1402.62	38	1507.95	37.5456	11.5093	n.r.
03346_37	1319.42	47.2274	1394.8	35.5035	1512.07	31.8411	12.741	n.r.
03346_54	254.061	26.7918	432.234	37.5987	1542.67	10.6033	83.5311	n.r.
03346_22	1361.64	50.4946	1439	39.076	1555.32	39.8304	12.4528	n.r.
03346_56	1625.24	70.2794	1605.81	54.5112	1580.58	51.1432	-2.82556	n.r.
03346_71	1366.48	64.0445	1473.13	58.5791	1630.5	66.6142	16.1929	n.r.
18.LS-AB-1—Los Sombreros Formation (Ancaucha olistolith)—30° 05' 52.2" S,68° 51' 45.7" W
LSAB-1_12	557.062	39.9263	563.293	32.2289	588.5	12.1046	-0.490884	0.000677865
LSAB-1_49	915.243	64.5558	945.178	46.1888	1015.5	7.95046	9.87269	0.000847731
LSAB-1_45	1135.92	82.7404	1127.86	53.6362	1112	8.22357	-2.15066	0.00041559
LSAB-1_15	1115.25	76.79	1116.26	50.383	1118	8.68213	0.246174	0.00147468
LSAB-1_50	1121.67	79.9575	1136.96	52.6549	1166	7.01855	3.80217	0.000541677
LSAB-1_39	1185.95	82.7565	1203.67	53.4503	1235.5	10.0655	4.01084	0.00162929
LSAB-1_51	1203	83.4782	1223.64	53.6524	1260	9.00374	4.52359	0.000428095
LSAB-1_38	1237.58	85.9517	1251.61	54.4197	1275.5	7.02532	2.97256	0.000454133
LSAB-1_28	1258.68	86.8987	1265.36	54.4832	1276.5	6.94488	1.39608	0.000289893
LSAB-1_37	1236.4	86.6934	1252.31	54.9281	1279.5	5.86082	3.36886	0.000245234
LSAB-1_29	1262.27	87.8663	1269.38	55.0223	1281.5	6.52138	1.50051	0.000303042
LSAB-1_23	1299.83	89.9688	1295.51	55.4199	1288	6.26248	-0.918802	0.000303342
LSAB-1_43	1239.21	85.7921	1258.62	54.4081	1292	7.01572	4.08591	0.000851332
LSAB-1_20	1342.88	112.001	1324.55	68.864	1295	36.3495	-3.6974	0.000841312
LSAB-1_53	1260.26	86.9883	1273.6	54.6812	1296	8.40274	2.75786	0.000347332
LSAB-1_5	1172.34	81.4694	1224.71	53.6236	1318	8.74457	11.0516	0.00057222
LSAB-1_8	1116.84	87.5898	1189.81	59.2379	1325	6.52156	15.7102	0.000302663
LSAB-1_26	1295.98	89.4985	1311.18	55.6918	1336	10.4477	2.99553	0.00151436
LSAB-1_2	1187.89	82.8676	1245.33	54.4121	1346	11.31	11.7466	0.00120761
LSAB-1_35	875.762	66.5022	1025.99	52.1417	1362	14.978	35.7003	0.00129715
LSAB-1_31	1381.58	94.7674	1376.64	56.8942	1369	6.28203	-0.91906	0.0002699
LSAB-1_16	1399.54	95.7601	1387.65	57.0396	1369.5	6.15134	-2.19331	0.000441256
LSAB-1_27	1343.16	92.1429	1353.99	56.3301	1371	8.10409	2.03076	0.000609979
LSAB-1_40	1356.2	95.014	1361.99	57.7118	1371	7.31307	1.07953	0.000548766
LSAB-1_44	1300.99	89.0686	1328.18	55.578	1372	10.2442	5.17568	0.00148754
LSAB-1_3	1178.71	82.3433	1249.76	57.1122	1374	47.5251	14.2132	0.00151209
LSAB-1_42	1298.31	89.6296	1327.24	55.9399	1374	7.30373	5.50842	0.000461267
LSAB-1_17	1417.85	97.5207	1400.84	57.701	1375	8.08851	-3.11629	0.000518893
LSAB-1_52	1299.68	92.2783	1328.82	57.5659	1376	8.08472	5.54674	0.000549058
LSAB-1_25	1327.27	92.2908	1346.91	56.9768	1378	12.0221	3.68139	0.0021068
LSAB-1_41	1348.14	92.9148	1359.96	56.7452	1378.5	8.90468	2.20236	0.00105035
LSAB-1_33	1358.28	93.4771	1367.32	56.8241	1381.5	7.66509	1.68073	0.000661209
LSAB-1_34	1354.24	94.0466	1364.93	57.4939	1381.5	15.2774	1.97335	0.0021095
LSAB-1_14	1405.03	96.0636	1396.45	57.3266	1383	11.9876	-1.59318	0.00301584
LSAB-1_48	1268.22	87.9383	1312.29	55.7429	1385	6.89876	8.43145	0.000381105
LSAB-1_47	1262.89	86.9005	1309.02	55.2405	1385.5	7.26668	8.84947	0.00149293
LSAB-1_21	1349.36	92.0286	1365.44	56.3702	1390.5	12.3937	2.95874	0.0007494
LSAB-1_6	1307.81	100.478	1341.89	62.5387	1396.5	7.23239	6.35055	0.000431094
LSAB-1_54	1253.54	86.8547	1308.18	56.6382	1399	30.0667	10.3977	0.000896668
LSAB-1_9	1215.47	95.6606	1284.57	62.2887	1402	8.38736	13.3046	0.000457794
LSAB-1_7	1204.47	82.8634	1279.01	54.4053	1406.5	9.19688	14.3639	0.000852849
LSAB-1_19	1379.84	94.4274	1395.09	57.0936	1418.5	5.47057	2.72563	0.000170558
LSAB-1_24	1480.6	101.441	1473.97	59.0504	1464.5	6.25783	-1.0995	0.000524406
LSAB-1_18	1468.8	99.8074	1468.37	58.4594	1467.5	8.12354	-0.0889064	0.000771153
LSAB-1_11	1515.19	103.299	1495.67	59.285	1468	5.75322	-3.2147	0.000460626
LSAB-1_4	1169.33	89.2779	1282.46	61.0036	1477	27.6607	20.8307	0.00432599
LSAB-1_36	1420.89	97.6867	1444.9	58.4876	1480.5	7.32984	4.02604	0.000350898
LSAB-1_1	1346.5	93.0824	1407.46	58.644	1501	26.3237	10.2933	0.00168368
LSAB-1_46	1318.27	90.9986	1398.5	62.6494	1523	63.9914	13.4426	0.0013264
LSAB-1_10	865.025	74.4656	1073.47	60.378	1525	12.3026	43.277	0.000543183
LSAB-1_32	1328.23	89.2871	1406.99	67.5872	1528	95.5281	13.0738	0.00203768
LSAB-1_30	1583.14	105.417	1607.35	60.0997	1639	9.98542	3.40822	0.00178032
LSAB-1_55	1569.85	105.988	1601.83	60.6869	1644	6.23178	4.51028	0.000388741
LSAB-1_22	1645.04	109.788	1646.26	61.0082	1647.5	6.5142	0.149302	0.0003707
LSAB-1_13	1392.98	94.2712	1505.72	121.875	1668	260.801	16.4879	0.00164946
19.LS-RJ-1— Los Sombreros Formation (quartz-pebble conglomerate olistolith)—30° 13' 03.6" S, 68° 58' 06.9" W
LS-RJ-1_15	643.863	42.5982	650.594	33.4148	674	17.839	-0.613708	0.00104082
LS-RJ-1_38	1001.94	42.7794	1020.12	30.0107	1059	17.3523	5.38836	0.000315175
LS-RJ-1_46B	1074.78	44.0227	1071.68	29.8073	1065	17.1853	-0.918687	0.000310663
LS-RJ-1_43B	1003.42	41.3087	1023.16	29.0123	1065.5	17.011	5.82592	0.000372687
LS-RJ-1_37	1011.08	42.7428	1031.97	30.0414	1076.5	18.8936	6.07682	0.00184408
LS-RJ-1_46A	974.346	44.3466	1006.33	31.7888	1076.5	20.5094	9.48941	0.000283382
LS-RJ-1_34	1028.1	44.7412	1044.78	31.0321	1079.5	17.0521	4.76123	0.00020247
LS-RJ-1_13	1083.45	69.6049	1082.37	46.347	1080	15.736	-0.319721	0.00076845
LS-RJ-1_51	1057.43	47.7628	1065.05	32.6118	1080.5	17.4785	2.13555	0.000564302
LS-RJ-1_11	1067.31	68.8323	1072.42	46.2134	1082.5	15.3398	1.40359	0.0017778
LS-RJ-1_26	1103.77	51.9879	1096.74	34.6328	1082.5	17.4725	-1.96453	0.000166793
LS-RJ-1_10	1110.03	69.0641	1101.24	45.3527	1084	13.2963	-2.40156	0.000412798
LS-RJ-1_43A	916.361	44.1313	967.281	32.4496	1084.5	16.9964	15.5038	0.0002762
LS-RJ-1_9	1078.31	67.4853	1080.77	45.0311	1085.5	13.1152	0.662395	0.000269865
LS-RJ-1_12	1067.92	69.7099	1073.69	46.8724	1085.5	17.3539	1.61969	0.00147413
LS-RJ-1_5	988.215	60.4857	1020.47	42.3975	1090	14.2498	9.33809	0.000600247
LS-RJ-1_14	1060.33	69.3533	1071.31	46.8457	1093.5	16.4564	3.03362	0.00158017
LS-RJ-1_24	1074.16	52.2422	1081.65	35.8754	1096.5	25.2269	2.03695	0.00514808
LS-RJ-1_44	1004.89	45.7311	1034.51	32.6761	1097.5	24.7694	8.43798	0.00275028
LS-RJ-1_29	1065.49	54.8819	1076.3	37.3879	1098	19.6987	2.96121	0.00195794
LS-RJ-1_42	1036.52	47.609	1061.14	33.1752	1112	19.9413	6.78793	0.00232828
LS-RJ-1_2	982.244	61.308	1025.07	43.6277	1117.5	21.7353	12.1034	0.00316147
LS-RJ-1_8	1129.8	73.9085	1135.34	48.6274	1146	16.5247	1.41333	0.00104854
LS-RJ-1_54	1195.4	54.5352	1193.4	35.5018	1189.5	19.1816	-0.495652	0.00163262
LS-RJ-1_32	1226.34	48.7778	1219.47	31.6437	1207	20.0054	-1.60257	0.00226959
LS-RJ-1_22	1111.72	81.7959	1155.57	55.2782	1238.5	22.9679	10.2367	0.00664858
LS-RJ-1_23	1234.64	56.5734	1238.89	36.3198	1246	17.0441	0.912065	0.000957497
LS-RJ-1_52	1248.62	56.9575	1247.99	36.4927	1247	19.4483	-0.12958	0.0022956
LS-RJ-1_4	988.84	66.9774	1077.86	49.7371	1262.5	38.1245	21.6761	0.00555164
LS-RJ-1_6	1102.08	66.9218	1158.42	45.9256	1265	22.4455	12.8789	0.00202173
LS-RJ-1_40	1186.16	52.0459	1216.64	34.5923	1271	19.9151	6.67503	0.00195773
LS-RJ-1_20	1273.91	80.5508	1274.05	50.3694	1274	13.7962	0.00703686	0.000896298
LS-RJ-1_30	1233.36	68.5069	1248.36	44.3136	1274	23.4035	3.18963	0.00322324
LS-RJ-1_58	1307.99	56.4754	1296.9	35.4209	1278.5	18.9826	-2.30659	0.00133242
LS-RJ-1_31	1190.35	50.2642	1222.94	33.254	1280.5	17.1204	7.04022	0.00127736
LS-RJ-1_19	1247.25	80.1405	1260.18	50.7485	1282	12.6316	2.71032	0.000324477
LS-RJ-1_3	1162.11	73.0043	1206.92	49.5954	1288	34.5575	9.77437	0.00567147
LS-RJ-1_25	1272.74	59.0587	1278.45	37.6013	1288	19.2134	1.18479	0.00197484
LS-RJ-1_60	1310.5	58.2229	1302.96	36.5517	1290.5	19.7919	-1.55006	0.00323188
LS-RJ-1_48	1242.78	55.8684	1261.15	36.4362	1292.5	22.8502	3.84703	0.00208273
LS-RJ-1_41	1167.72	49.5477	1213.34	33.6625	1295.5	22.8217	9.86349	0.00548294
LS-RJ-1_27	1325.75	59.0916	1330.1	37.1317	1337	20.4201	0.841201	0.0027084
LS-RJ-1_53	1347.52	61.0533	1345.79	37.8937	1343	19.1838	-0.336605	0.00345451
LS-RJ-1_35	1197.19	52.3758	1251.3	42.3333	1345.5	67.6779	11.0229	0.0184269
LS-RJ-1_56	1355.98	59.5043	1354.38	36.7046	1351.5	16.5776	-0.331798	0.000309367
LS-RJ-1_49B	1403.92	56.2131	1384.35	34.0586	1354	16.3237	-3.68721	0.000208937
LS-RJ-1_39	1266.78	54.0828	1300.41	34.8044	1356	16.2563	6.57944	0.000615555
LS-RJ-1_16	1324.93	79.6938	1339.6	49.3068	1363	12.9583	2.79321	0.000713302
LS-RJ-1_49A	1263.57	57.8417	1301.48	37.2404	1364.5	16.3722	7.39656	0.000169003
LS-RJ-1_50	1331.49	56.0518	1344.96	35.1605	1366.5	17.5814	2.56166	0.00075993
LS-RJ-1_1	1254.56	75.1828	1298.17	48.1986	1371	14.5507	8.49323	0.000899847
LS-RJ-1_45	1330.92	56.395	1347.19	35.4395	1373	18.0006	3.06498	0.00122016
LS-RJ-1_59	1458.84	65.8493	1424.59	38.9112	1373.5	16.6539	-6.21332	0.000774018
LS-RJ-1_47	1297.15	57.8478	1326.54	36.8363	1374	17.77	5.59336	0.000990334
LS-RJ-1_28	1414.78	73.9151	1399.88	44.3438	1377	16.9646	-2.74359	0.000545658
LS-RJ-1_33	1318.28	58.8839	1341.17	37.0511	1377.5	16.3749	4.29904	0.000405103
LS-RJ-1_7	1361.22	86.5132	1368.36	52.8291	1379.5	15.7996	1.32537	0.00128153
LS-RJ-1_36	1299.79	53.7285	1330.22	34.2482	1379.5	16.9544	5.77843	0.000683513
LS-RJ-1_21	1399.43	63.3667	1392.37	38.4542	1381.5	16.6277	-1.29813	0.000444062
LS-RJ-1_57	1434.4	58.8655	1413.6	35.3049	1382	16.4754	-3.7916	0.000299934
LS-RJ-1_17	1395.96	87.669	1392.37	52.6671	1386.5	13.117	-0.682446	0.000600965
LS-RJ-1_18	1369.22	83.2805	1376.97	50.684	1389	13.3527	1.42423	0.000446265
LS-RJ-1_55	1421.18	63.9406	1409.01	38.5786	1390.5	17.9216	-2.20634	0.00103561
Notes:
* = 235U calculated from 238U
%D = percent discordance of 206/238 age vs. 207/206 age for ages >900 Ma;
for ages <900 Ma, calculated from 206/238 age vs. 207/235 age
204Pb/206Pb represents (204Pb+204Hg)/206Pb; no common Pb corrections made
n.r. = not reported
